# Supplementary material
Source: PubMed Central journal article supplement (PMC4909477)
Supplement: NIHMS774721-supplement-2.pdf [file NIHMS774721-supplement-2.pdf]

**Supplemental Data for: Lipidomics profile of a NAPE-PLD KO mouse  
provides evidence of a broader role of this enzyme in lipid metabolism  
in the brain**

Emma Leishman, Ken Mackie, Serge Luquet, and Heather B Bradshaw

Corresponding Author: Heather B Bradshaw, PhD

Associate Professor

Indiana University

1101 East 10<sup>th</sup> Street

Bloomington IN 47405

[hbradsh@indiana.edu](mailto:hbradsh@indiana.edu)

[Phone: 1-812-855-1659](tel:1-812-855-1659)

[Fax: 1-812-855-4691](tel:1-812-855-4691)

**Supplemental Tables 1-16; 25 pages**

All lipid levels are expressed in moles per gram of tissue.

**Supplemental Table 1: Lipid levels (moles per gram tissue) in the striatum of WT and NAPE-PLD KO mice**

|                                         | Striatum |          |           |             |          |           |
|-----------------------------------------|----------|----------|-----------|-------------|----------|-----------|
|                                         | WT       |          |           | NAPE-PLD KO |          |           |
| <b>N-acyl alanine</b>                   | Mean     | Std Dev  | Std Error | Mean        | Std Dev  | Std Error |
| <i>N</i> -palmitoyl alanine             | 3.88E-12 | 1.65E-12 | 6.73E-13  | 2.95E-12    | 1.09E-12 | 4.47E-13  |
| <i>N</i> -stearoyl alanine              | 1.97E-12 | 5.68E-13 | 2.32E-13  | 1.81E-12    | 9.36E-13 | 3.82E-13  |
| <i>N</i> -oleoyl alanine                | 8.84E-13 | 2.88E-13 | 1.18E-13  | 6.70E-13    | 2.90E-13 | 1.18E-13  |
| <i>N</i> -linoleoyl alanine             | BDL      |          |           | BDL         |          |           |
| <i>N</i> -arachidonoyl alanine          | BDL      |          |           | BDL         |          |           |
| <i>N</i> -docosahexaenoyl alanine       | BDL      |          |           | BDL         |          |           |
| <b>N-acyl dopamine</b>                  |          |          |           |             |          |           |
| <i>N</i> -oleoyl dopamine               | BDL      |          |           | BDL         |          |           |
| <i>N</i> -arachidonoyl dopamine         | 5.07E-11 | 8.35E-12 | 3.41E-12  | 4.46E-11    | 9.87E-12 | 4.03E-12  |
| <b>N-acyl ethanolamine</b>              |          |          |           |             |          |           |
| <i>N</i> -palmitoyl ethanolamine        | 1.98E-10 | 3.22E-11 | 1.32E-11  | 1.09E-10    | 5.74E-12 | 2.35E-12  |
| <i>N</i> -stearoyl ethanolamine         | 1.37E-10 | 4.29E-11 | 1.75E-11  | 5.38E-11    | 9.01E-12 | 3.68E-12  |
| <i>N</i> -oleoyl ethanolamine           | 2.85E-10 | 5.33E-11 | 2.18E-11  | 1.64E-10    | 6.41E-12 | 2.62E-12  |
| <i>N</i> -linoleoyl ethanolamine        | 1.25E-10 | 2.64E-11 | 1.08E-11  | 1.24E-11    | 1.94E-12 | 7.93E-13  |
| <i>N</i> -arachidonoyl ethanolamine     | 2.60E-11 | 5.87E-12 | 2.40E-12  | 5.96E-12    | 5.98E-13 | 2.44E-13  |
| <i>N</i> -docosahexaenoyl ethanolamine  | 7.93E-11 | 1.51E-11 | 6.17E-12  | 2.20E-11    | 2.22E-12 | 9.04E-13  |
| <b>N-acyl GABA</b>                      |          |          |           |             |          |           |
| <i>N</i> -palmitoyl GABA                | 3.10E-12 | 6.49E-13 | 2.65E-13  | 2.80E-12    | 4.57E-13 | 1.87E-13  |
| <i>N</i> -stearoyl GABA                 | 4.14E-12 | 4.85E-13 | 1.98E-13  | 3.42E-12    | 1.64E-12 | 6.69E-13  |
| <i>N</i> -oleoyl GABA                   | 9.38E-13 | 3.37E-13 | 1.37E-13  | 7.28E-13    | 2.40E-13 | 9.82E-14  |
| <i>N</i> -linoleoyl GABA                | BDL      |          |           | BDL         |          |           |
| <i>N</i> -arachidonoyl GABA             | 7.74E-12 | 2.53E-12 | 1.03E-12  | 6.81E-12    | 1.58E-12 | 6.46E-13  |
| <i>N</i> -docosahexaenoyl GABA          | BDL      |          |           | BDL         |          |           |
| <b>N-acyl glycine</b>                   |          |          |           |             |          |           |
| <i>N</i> -palmitoyl glycine             | 3.73E-11 | 4.19E-12 | 1.71E-12  | 3.70E-11    | 3.97E-12 | 1.62E-12  |
| <i>N</i> -stearoyl glycine              | 5.88E-12 | 2.21E-12 | 9.04E-13  | 5.86E-12    | 2.14E-12 | 8.75E-13  |
| <i>N</i> -oleoyl glycine                | 7.33E-12 | 1.32E-12 | 5.37E-13  | 6.45E-12    | 1.79E-12 | 7.30E-13  |
| <i>N</i> -linoleoyl glycine             | 2.27E-12 | 1.46E-12 | 5.97E-13  | 1.76E-12    | 1.23E-12 | 5.03E-13  |
| <i>N</i> -arachidonoyl glycine          | 9.52E-12 | 3.04E-12 | 1.24E-12  | 1.15E-11    | 1.94E-12 | 7.93E-13  |
| <i>N</i> -docosahexaenoyl glycine       | 2.04E-12 | 1.36E-12 | 5.57E-13  | 4.12E-12    | 1.94E-12 | 7.90E-13  |
| <b>N-acyl leucine</b>                   |          |          |           |             |          |           |
| <i>N</i> -palmitoyl leucine             | 2.02E-12 | 4.80E-13 | 1.96E-13  | 1.77E-12    | 3.91E-13 | 1.60E-13  |
| <i>N</i> -stearoyl leucine              | 3.73E-12 | 9.29E-13 | 3.79E-13  | 3.69E-12    | 8.62E-13 | 3.52E-13  |
| <i>N</i> -oleoyl leucine                | 1.57E-12 | 6.18E-13 | 2.52E-13  | 1.82E-12    | 5.22E-13 | 2.13E-13  |
| <i>N</i> -linoleoyl leucine             | BDL      |          |           | BDL         |          |           |
| <i>N</i> -docosahexaenoyl leucine       | BDL      |          |           | BDL         |          |           |
| <b>N-acyl methionine</b>                |          |          |           |             |          |           |
| <i>N</i> -palmitoyl methionine          | 4.32E-12 | 1.36E-12 | 5.55E-13  | 4.39E-12    | 1.55E-12 | 6.31E-13  |
| <i>N</i> -stearoyl methionine           | 1.27E-12 | 3.00E-13 | 1.22E-13  | 1.19E-12    | 5.32E-13 | 2.17E-13  |
| <i>N</i> -oleoyl methionine             | 2.21E-12 | 9.20E-13 | 3.76E-13  | 2.08E-12    | 1.29E-12 | 5.25E-13  |
| <i>N</i> -linoleoyl methionine          | BDL      |          |           | BDL         |          |           |
| <i>N</i> -arachidonoyl methionine       | BDL      |          |           | BDL         |          |           |
| <i>N</i> -docosahexaenoyl methionine    | BDL      |          |           | BDL         |          |           |
| <b>N-acyl phenylalanine</b>             |          |          |           |             |          |           |
| <i>N</i> -palmitoyl phenylalanine       | 2.44E-12 | 6.79E-13 | 2.77E-13  | 2.59E-12    | 7.34E-13 | 3.00E-13  |
| <i>N</i> -stearoyl phenylalanine        | 1.79E-12 | 8.84E-13 | 3.61E-13  | 1.69E-12    | 6.13E-13 | 2.50E-13  |
| <i>N</i> -oleoyl phenylalanine          | 6.97E-13 | 2.23E-13 | 9.09E-14  | 6.44E-13    | 2.23E-13 | 9.12E-14  |
| <i>N</i> -linoleoyl phenylalanine       | BDL      |          |           | BDL         |          |           |
| <i>N</i> -arachidonoyl phenylalanine    | 8.56E-13 | 6.29E-13 | 2.57E-13  | 3.30E-13    | 2.48E-13 | 1.01E-13  |
| <i>N</i> -docosahexaenoyl phenylalanine | BDL      |          |           | BDL         |          |           |

## Supplemental Table 1: Continued

|                                      | Striatum |          |           |             |          |           |
|--------------------------------------|----------|----------|-----------|-------------|----------|-----------|
|                                      | WT       |          |           | NAPE-PLD KO |          |           |
|                                      | Mean     | Std Dev  | Std Error | Mean        | Std Dev  | Std Error |
| <b>N-acyl proline</b>                |          |          |           |             |          |           |
| <i>N</i> -palmitoyl proline          | 8.98E-13 | 1.16E-13 | 4.73E-14  | 1.02E-12    | 4.51E-13 | 1.84E-13  |
| <i>N</i> -stearoyl proline           | BDL      |          |           | BDL         |          |           |
| <i>N</i> -oleoyl proline             | BDL      |          |           | BDL         |          |           |
| <i>N</i> -linoleoyl proline          | BDL      |          |           | BDL         |          |           |
| <i>N</i> -arachidonoyl proline       | BDL      |          |           | BDL         |          |           |
| <i>N</i> -docosahexaenoyl proline    | BDL      |          |           | BDL         |          |           |
| <b>N-acyl serine</b>                 |          |          |           |             |          |           |
| <i>N</i> -palmitoyl serine           | 4.21E-11 | 6.59E-12 | 2.69E-12  | 3.98E-11    | 2.31E-12 | 9.41E-13  |
| <i>N</i> -stearoyl serine            | 2.52E-11 | 7.22E-12 | 2.95E-12  | 1.92E-11    | 4.13E-12 | 1.69E-12  |
| <i>N</i> -oleoyl serine              | 4.74E-10 | 6.54E-11 | 2.67E-11  | 4.50E-10    | 4.99E-11 | 2.04E-11  |
| <i>N</i> -linoleoyl serine           | 3.26E-11 | 9.09E-12 | 3.71E-12  | 3.16E-11    | 6.70E-12 | 2.74E-12  |
| <i>N</i> -arachidonoyl serine        | 1.02E-12 | 6.56E-13 | 2.68E-13  | 1.08E-12    | 8.31E-14 | 3.39E-14  |
| <i>N</i> -docosahexaenoyl serine     | 1.54E-11 | 3.95E-12 | 1.61E-12  | 1.36E-11    | 5.06E-12 | 2.07E-12  |
| <b>N-acyl taurine</b>                |          |          |           |             |          |           |
| <i>N</i> -arachidonoyl taurine       | 3.18E-10 | 6.16E-11 | 2.52E-11  | 3.37E-10    | 3.19E-11 | 1.30E-11  |
| <b>N-acyl tryptophan</b>             |          |          |           |             |          |           |
| <i>N</i> -palmitoyl tryptophan       | 2.92E-12 | 8.78E-13 | 3.58E-13  | 2.65E-12    | 1.33E-12 | 5.43E-13  |
| <i>N</i> -stearoyl tryptophan        | 2.90E-12 | 4.60E-13 | 1.88E-13  | 2.50E-12    | 7.94E-13 | 3.24E-13  |
| <i>N</i> -oleoyl tryptophan          | BDL      |          |           | BDL         |          |           |
| <i>N</i> -linoleoyl tryptophan       | BDL      |          |           | BDL         |          |           |
| <i>N</i> -arachidonoyl tryptophan    | BDL      |          |           | BDL         |          |           |
| <i>N</i> -docosahexaenoyl tryptophan | BDL      |          |           | BDL         |          |           |
| <b>N-acyl tyrosine</b>               |          |          |           |             |          |           |
| <i>N</i> -palmitoyl tyrosine         | 1.27E-12 | 3.26E-13 | 1.33E-13  | 1.22E-12    | 3.55E-13 | 1.45E-13  |
| <i>N</i> -stearoyl tyrosine          | BDL      |          |           | BDL         |          |           |
| <i>N</i> -oleoyl tyrosine            | 6.49E-13 | 2.89E-13 | 1.18E-13  | 7.14E-13    | 3.09E-13 | 1.26E-13  |
| <i>N</i> -linoleoyl tyrosine         | BDL      |          |           | BDL         |          |           |
| <i>N</i> -arachidonoyl tyrosine      | BDL      |          |           | BDL         |          |           |
| <i>N</i> -docosahexaenoyl tyrosine   | BDL      |          |           | BDL         |          |           |
| <b>N-acyl valine</b>                 |          |          |           |             |          |           |
| <i>N</i> -palmitoyl valine           | 1.86E-12 | 8.24E-13 | 3.36E-13  | 1.79E-12    | 6.59E-13 | 2.69E-13  |
| <i>N</i> -stearoyl valine            | 1.16E-12 | 6.99E-13 | 2.85E-13  | 1.28E-12    | 4.71E-13 | 1.92E-13  |
| <i>N</i> -oleoyl valine              | BDL      |          |           | BDL         |          |           |
| <i>N</i> -nervonoyl valine           | BDL      |          |           | BDL         |          |           |
| <i>N</i> -linoleoyl valine           | BDL      |          |           | BDL         |          |           |
| <i>N</i> -docosahexaenoyl valine     | BDL      |          |           | BDL         |          |           |
| <b>Free Fatty Acids</b>              |          |          |           |             |          |           |
| Linoleic acid                        | 8.87E-10 | 1.65E-10 | 6.75E-11  | 8.50E-10    | 1.03E-10 | 4.20E-11  |
| Arachidonic acid                     | 1.26E-08 | 1.26E-09 | 5.14E-10  | 1.33E-08    | 5.65E-10 | 2.31E-10  |
| <b>2-acyl-<i>sn</i>-glycerol</b>     |          |          |           |             |          |           |
| 2-arachidonoyl- <i>sn</i> -glycerol  | 1.10E-09 | 2.39E-10 | 9.77E-11  | 1.11E-09    | 1.51E-10 | 6.15E-11  |
| 2-linoleoyl- <i>sn</i> -glycerol     | 3.40E-10 | 9.56E-11 | 3.90E-11  | 2.30E-10    | 2.41E-11 | 9.85E-12  |
| 2-oleoyl- <i>sn</i> -glycerol        | 5.30E-08 | 2.05E-08 | 8.37E-09  | 4.80E-08    | 1.33E-08 | 5.44E-09  |
| <b>Prostaglandins</b>                |          |          |           |             |          |           |
| PGE <sub>2</sub>                     | 1.70E-10 | 4.21E-11 | 1.72E-11  | 3.20E-10    | 4.46E-11 | 1.82E-11  |
| PGF <sub>2α</sub>                    | 1.92E-10 | 2.41E-11 | 9.82E-12  | 2.13E-10    | 6.89E-12 | 2.81E-12  |

**Supplemental Table 2: List of lipids in the striatum significantly affected by NAPE-PLD deletion**

| Striatum Significant Differences in One-Way ANOVA |         |       |                            |                        |
|---------------------------------------------------|---------|-------|----------------------------|------------------------|
| Lipid                                             | F       | p     | Direction (relative to WT) | Magnitude (x WT level) |
| <i>N</i> -palmitoyl ethanolamine                  | 45.237  | 0     | ↓                          | 0.55                   |
| <i>N</i> -stearoyl ethanolamine                   | 21.476  | 0.001 | ↓                          | 0.39                   |
| <i>N</i> -oleoyl ethanolamine                     | 30.76   | 0     | ↓                          | 0.57                   |
| <i>N</i> -linoleoyl ethanolamine                  | 108.365 | 0     | ↓                          | 0.1                    |
| <i>N</i> -arachidonoyl ethanolamine               | 69.129  | 0     | ↓                          | 0.23                   |
| <i>N</i> -docosahexaenoyl ethanolamine            | 84.371  | 0     | ↓                          | 0.28                   |
| <i>N</i> -docosahexaenoyl glycine                 | 4.62    | 0.057 | ↑                          | 1.97                   |
| <i>N</i> -arachidonoyl phenylalanine              | 3.635   | 0.086 | ↓                          | 0.45                   |
| 2-linoleoyl- <i>sn</i> -glycerol                  | 7.415   | 0.021 | ↓                          | 0.68                   |
| PGE <sub>2</sub>                                  | 35.756  | 0     | ↑                          | 1.88                   |
| PGF <sub>2α</sub>                                 | 4.166   | 0.069 | ↑                          | 1.11                   |

**Supplemental Table 3: Lipid levels (moles per gram tissue) in the hippocampus of WT and NAPE-PLD KO mice**

|                                         | Hippocampus |          |           |             |          |           |
|-----------------------------------------|-------------|----------|-----------|-------------|----------|-----------|
|                                         | WT          |          |           | NAPE-PLD KO |          |           |
|                                         | Mean        | Std Dev  | Std Error | Mean        | Std Dev  | Std Error |
| <b><i>N</i>-acyl alanine</b>            |             |          |           |             |          |           |
| <i>N</i> -palmitoyl alanine             | 3.80E-12    | 4.96E-13 | 2.02E-13  | 2.81E-12    | 1.03E-12 | 4.21E-13  |
| <i>N</i> -stearoyl alanine              | 2.47E-12    | 7.25E-13 | 2.96E-13  | 1.94E-12    | 1.04E-12 | 4.24E-13  |
| <i>N</i> -oleoyl alanine                | 9.27E-13    | 3.78E-13 | 1.54E-13  | 8.15E-13    | 3.81E-13 | 1.55E-13  |
| <i>N</i> -linoleoyl alanine             | BDL         |          |           | BDL         |          |           |
| <i>N</i> -arachidonoyl alanine          | 1.57E-12    | 5.11E-13 | 2.09E-13  | 2.32E-12    | 1.18E-12 | 4.83E-13  |
| <i>N</i> -docosahexaenoyl alanine       | BDL         |          |           | BDL         |          |           |
| <b><i>N</i>-acyl dopamine</b>           |             |          |           |             |          |           |
| <i>N</i> -oleoyl dopamine               | BDL         |          |           | BDL         |          |           |
| <i>N</i> -arachidonoyl dopamine         | BDL         |          |           | BDL         |          |           |
| <b><i>N</i>-acyl ethanolamine</b>       |             |          |           |             |          |           |
| <i>N</i> -palmitoyl ethanolamine        | 1.31E-10    | 1.84E-11 | 7.49E-12  | 6.86E-11    | 7.33E-12 | 2.99E-12  |
| <i>N</i> -stearoyl ethanolamine         | 8.77E-11    | 1.26E-11 | 5.16E-12  | 3.61E-11    | 6.62E-12 | 2.70E-12  |
| <i>N</i> -oleoyl ethanolamine           | 1.64E-10    | 3.16E-11 | 1.29E-11  | 9.27E-11    | 1.63E-11 | 6.64E-12  |
| <i>N</i> -linoleoyl ethanolamine        | 8.40E-11    | 1.10E-11 | 4.47E-12  | 1.08E-11    | 3.34E-12 | 1.36E-12  |
| <i>N</i> -arachidonoyl ethanolamine     | 3.97E-11    | 3.60E-12 | 1.47E-12  | 1.13E-11    | 2.73E-12 | 1.12E-12  |
| <i>N</i> -docosahexaenoyl ethanolamine  | 8.29E-11    | 1.48E-11 | 6.05E-12  | 2.10E-11    | 5.35E-12 | 2.19E-12  |
| <b><i>N</i>-acyl GABA</b>               |             |          |           |             |          |           |
| <i>N</i> -palmitoyl GABA                | 3.11E-12    | 5.89E-13 | 2.40E-13  | 2.92E-12    | 7.67E-13 | 3.13E-13  |
| <i>N</i> -stearoyl GABA                 | 4.11E-12    | 1.88E-12 | 7.67E-13  | 3.92E-12    | 9.78E-13 | 3.99E-13  |
| <i>N</i> -oleoyl GABA                   | 1.70E-12    | 4.80E-13 | 1.96E-13  | 1.27E-12    | 3.42E-13 | 1.40E-13  |
| <i>N</i> -linoleoyl GABA                | BDL         |          |           | BDL         |          |           |
| <i>N</i> -arachidonoyl GABA             | 2.55E-11    | 2.70E-12 | 1.10E-12  | 2.64E-11    | 4.30E-12 | 1.76E-12  |
| <i>N</i> -docosahexaenoyl GABA          | 9.97E-12    | 3.03E-12 | 1.24E-12  | 1.29E-11    | 5.64E-12 | 2.30E-12  |
| <b><i>N</i>-acyl glycine</b>            |             |          |           |             |          |           |
| <i>N</i> -palmitoyl glycine             | 3.76E-11    | 3.76E-12 | 1.53E-12  | 4.04E-11    | 8.09E-12 | 3.30E-12  |
| <i>N</i> -stearoyl glycine              | 8.09E-12    | 2.66E-12 | 1.09E-12  | 8.13E-12    | 2.64E-12 | 1.08E-12  |
| <i>N</i> -oleoyl glycine                | 8.28E-12    | 2.03E-12 | 8.30E-13  | 1.11E-11    | 1.08E-12 | 4.40E-13  |
| <i>N</i> -linoleoyl glycine             | 2.32E-12    | 1.38E-12 | 5.62E-13  | 2.35E-12    | 1.49E-12 | 6.07E-13  |
| <i>N</i> -arachidonoyl glycine          | 3.06E-11    | 4.05E-12 | 1.65E-12  | 3.66E-11    | 4.47E-12 | 1.83E-12  |
| <i>N</i> -docosahexaenoyl glycine       | 4.23E-12    | 2.10E-12 | 8.58E-13  | 5.65E-12    | 7.12E-13 | 2.91E-13  |
| <b><i>N</i>-acyl leucine</b>            |             |          |           |             |          |           |
| <i>N</i> -palmitoyl leucine             | 1.95E-12    | 6.54E-13 | 2.67E-13  | 2.04E-12    | 2.12E-13 | 8.66E-14  |
| <i>N</i> -stearoyl leucine              | 4.16E-12    | 9.51E-13 | 3.88E-13  | 4.20E-12    | 1.06E-12 | 4.35E-13  |
| <i>N</i> -oleoyl leucine                | 1.47E-12    | 4.62E-13 | 1.88E-13  | 1.32E-12    | 6.12E-13 | 2.50E-13  |
| <i>N</i> -linoleoyl leucine             | BDL         |          |           | BDL         |          |           |
| <i>N</i> -docosahexaenoyl leucine       | 1.28E-12    | 4.70E-13 | 1.92E-13  | 1.40E-12    | 3.92E-13 | 1.60E-13  |
| <b><i>N</i>-acyl methionine</b>         |             |          |           |             |          |           |
| <i>N</i> -palmitoyl methionine          | BDL         |          |           | BDL         |          |           |
| <i>N</i> -stearoyl methionine           | 1.45E-12    | 8.45E-13 | 3.45E-13  | 1.23E-12    | 3.25E-13 | 1.33E-13  |
| <i>N</i> -oleoyl methionine             | 1.85E-12    | 8.52E-13 | 3.48E-13  | 1.77E-12    | 7.43E-13 | 3.03E-13  |
| <i>N</i> -linoleoyl methionine          | BDL         |          |           | BDL         |          |           |
| <i>N</i> -arachidonoyl methionine       | BDL         |          |           | BDL         |          |           |
| <i>N</i> -docosahexaenoyl methionine    | BDL         |          |           | BDL         |          |           |
| <b><i>N</i>-acyl phenylalanine</b>      |             |          |           |             |          |           |
| <i>N</i> -palmitoyl phenylalanine       | 3.19E-12    | 7.75E-13 | 3.16E-13  | 2.65E-12    | 5.08E-13 | 2.07E-13  |
| <i>N</i> -stearoyl phenylalanine        | 2.69E-12    | 1.07E-12 | 4.35E-13  | 1.69E-12    | 5.32E-13 | 2.17E-13  |
| <i>N</i> -oleoyl phenylalanine          | 6.28E-13    | 1.87E-13 | 7.63E-14  | 5.73E-13    | 1.36E-13 | 5.54E-14  |
| <i>N</i> -linoleoyl phenylalanine       | BDL         |          |           | BDL         |          |           |
| <i>N</i> -arachidonoyl phenylalanine    | 9.33E-13    | 4.21E-13 | 1.72E-13  | 6.57E-13    | 1.60E-13 | 6.51E-14  |
| <i>N</i> -docosahexaenoyl phenylalanine | 1.42E-12    | 6.38E-13 | 2.60E-13  | 7.79E-13    | 3.57E-13 | 1.46E-13  |

### Supplemental Table 3: Continued

|                                      | Hippocampus |          |           |             |          |           |
|--------------------------------------|-------------|----------|-----------|-------------|----------|-----------|
|                                      | WT          |          |           | NAPE-PLD KO |          |           |
|                                      | Mean        | Std Dev  | Std Error | Mean        | Std Dev  | Std Error |
| <b>N-acyl proline</b>                |             |          |           |             |          |           |
| <i>N</i> -palmitoyl proline          | 1.14E-12    | 3.83E-13 | 1.56E-13  | 9.91E-13    | 7.32E-13 | 2.99E-13  |
| <i>N</i> -stearoyl proline           | BDL         |          |           | BDL         |          |           |
| <i>N</i> -oleoyl proline             | BDL         |          |           | BDL         |          |           |
| <i>N</i> -linoleoyl proline          | BDL         |          |           | BDL         |          |           |
| <i>N</i> -arachidonoyl proline       | BDL         |          |           | BDL         |          |           |
| <i>N</i> -docosahexaenoyl proline    | BDL         |          |           | BDL         |          |           |
| <b>N-acyl serine</b>                 |             |          |           |             |          |           |
| <i>N</i> -palmitoyl serine           | 3.64E-11    | 3.20E-12 | 1.31E-12  | 3.57E-11    | 4.20E-12 | 1.72E-12  |
| <i>N</i> -stearoyl serine            | 1.64E-11    | 2.50E-12 | 1.02E-12  | 1.20E-11    | 3.08E-12 | 1.26E-12  |
| <i>N</i> -oleoyl serine              | 3.82E-10    | 4.68E-11 | 1.91E-11  | 4.17E-10    | 7.37E-11 | 3.01E-11  |
| <i>N</i> -linoleoyl serine           | 2.89E-11    | 4.41E-12 | 1.80E-12  | 3.13E-11    | 5.97E-12 | 2.44E-12  |
| <i>N</i> -arachidonoyl serine        | 2.19E-12    | 8.58E-13 | 3.50E-13  | 1.80E-12    | 2.95E-13 | 1.20E-13  |
| <i>N</i> -docosahexaenoyl serine     | 7.18E-12    | 4.55E-12 | 1.86E-12  | 1.02E-11    | 3.55E-12 | 1.45E-12  |
| <b>N-acyl taurine</b>                |             |          |           |             |          |           |
| <i>N</i> -arachidonoyl taurine       | 9.89E-10    | 1.65E-10 | 6.75E-11  | 1.12E-09    | 1.39E-10 | 5.68E-11  |
| <b>N-acyl tryptophan</b>             |             |          |           |             |          |           |
| <i>N</i> -palmitoyl tryptophan       | BDL         |          |           | BDL         |          |           |
| <i>N</i> -stearoyl tryptophan        | 3.42E-12    | 1.60E-12 | 6.53E-13  | 2.79E-12    | 5.97E-13 | 2.44E-13  |
| <i>N</i> -oleoyl tryptophan          | BDL         |          |           | BDL         |          |           |
| <i>N</i> -linoleoyl tryptophan       | BDL         |          |           | BDL         |          |           |
| <i>N</i> -arachidonoyl tryptophan    | BDL         |          |           | BDL         |          |           |
| <i>N</i> -docosahexaenoyl tryptophan | BDL         |          |           | BDL         |          |           |
| <b>N-acyl tyrosine</b>               |             |          |           |             |          |           |
| <i>N</i> -palmitoyl tyrosine         | 1.40E-12    | 4.93E-13 | 2.01E-13  | 1.79E-12    | 7.61E-13 | 3.11E-13  |
| <i>N</i> -stearoyl tyrosine          | BDL         |          |           | BDL         |          |           |
| <i>N</i> -oleoyl tyrosine            | BDL         |          |           | BDL         |          |           |
| <i>N</i> -linoleoyl tyrosine         | BDL         |          |           | BDL         |          |           |
| <i>N</i> -arachidonoyl tyrosine      | 1.84E-12    | 9.33E-13 | 3.81E-13  | 1.38E-12    | 3.46E-13 | 1.41E-13  |
| <i>N</i> -docosahexaenoyl tyrosine   | BDL         |          |           | BDL         |          |           |
| <b>N-acyl valine</b>                 |             |          |           |             |          |           |
| <i>N</i> -palmitoyl valine           | 1.43E-12    | 2.18E-13 | 8.91E-14  | 1.95E-12    | 7.75E-13 | 3.17E-13  |
| <i>N</i> -stearoyl valine            | 1.60E-12    | 7.04E-13 | 2.88E-13  | 1.30E-12    | 2.37E-13 | 9.69E-14  |
| <i>N</i> -oleoyl valine              | 1.54E-12    | 8.07E-13 | 3.30E-13  | 1.25E-12    | 5.51E-13 | 2.25E-13  |
| <i>N</i> -nervonoyl valine           | BDL         |          |           | BDL         |          |           |
| <i>N</i> -linoleoyl valine           | BDL         |          |           | BDL         |          |           |
| <i>N</i> -docosahexaenoyl valine     | BDL         |          |           | BDL         |          |           |
| <b>Free Fatty Acids</b>              |             |          |           |             |          |           |
| Linoleic acid                        | 9.85E-10    | 2.17E-10 | 8.86E-11  | 9.61E-10    | 1.86E-10 | 7.59E-11  |
| Arachidonic acid                     | 1.84E-08    | 2.77E-09 | 1.13E-09  | 1.98E-08    | 2.66E-09 | 1.09E-09  |
| <b>2-acyl-<i>sn</i>-glycerol</b>     |             |          |           |             |          |           |
| 2-arachidonoyl- <i>sn</i> -glycerol  | 1.07E-09    | 3.84E-10 | 1.57E-10  | 9.07E-10    | 2.12E-10 | 8.67E-11  |
| 2-linoleoyl- <i>sn</i> -glycerol     | 2.52E-10    | 5.90E-11 | 2.41E-11  | 2.15E-10    | 3.10E-11 | 1.26E-11  |
| 2-oleoyl- <i>sn</i> -glycerol        | 3.30E-08    | 5.18E-09 | 2.11E-09  | 3.62E-08    | 5.17E-09 | 2.11E-09  |
| <b>Prostaglandins</b>                |             |          |           |             |          |           |
| PGE <sub>2</sub>                     | 4.33E-10    | 1.25E-10 | 5.09E-11  | 8.67E-10    | 1.64E-10 | 6.69E-11  |
| PGF <sub>2α</sub>                    | 3.94E-10    | 4.79E-11 | 1.96E-11  | 5.17E-10    | 6.62E-11 | 2.70E-11  |

**Supplemental Table 4: List of lipids in the hippocampus significantly affected by NAPE-PLD deletion**

| Hippocampus Significant Differences in One-Way ANOVA |         |       |                            |                        |
|------------------------------------------------------|---------|-------|----------------------------|------------------------|
| Lipid                                                | F       | p     | Direction (relative to WT) | Magnitude (x WT level) |
| <i>N</i> -palmitoyl alanine                          | 4.485   | 0.06  | ↓                          | 0.75                   |
| <i>N</i> -palmitoyl ethanolamine                     | 59.873  | 0     | ↓                          | 0.52                   |
| <i>N</i> -stearoyl ethanolamine                      | 78.591  | 0     | ↓                          | 0.41                   |
| <i>N</i> -oleoyl ethanolamine                        | 23.995  | 0.001 | ↓                          | 0.57                   |
| <i>N</i> -linoleoyl ethanolamine                     | 244.898 | 0     | ↓                          | 0.13                   |
| <i>N</i> -arachidonoyl ethanolamine                  | 237.231 | 0     | ↓                          | 0.29                   |
| <i>N</i> -docosahexaenoyl ethanolamine               | 92.725  | 0     | ↓                          | 0.12                   |
| <i>N</i> -oleoyl glycine                             | 8.867   | 0.014 | ↑                          | 1.33                   |
| <i>N</i> -arachidonoyl glycine                       | 5.821   | 0.037 | ↑                          | 1.19                   |
| <i>N</i> -stearoyl phenylalanine                     | 4.216   | 0.067 | ↓                          | 0.64                   |
| <i>N</i> -docosahexaenoyl phenylalanine              | 4.558   | 0.059 | ↓                          | 0.58                   |
| <i>N</i> -stearoyl serine                            | 7.408   | 0.021 | ↓                          | 0.73                   |
| PGE <sub>2</sub>                                     | 26.612  | 0     | ↑                          | 2                      |
| PGF <sub>2α</sub>                                    | 13.647  | 0.004 | ↑                          | 1.31                   |

**Supplemental Table 5: Lipid levels (moles per gram tissue) in the cerebellum of WT and NAPE-PLD KO mice**

|                                         | Cerebellum |          |           |             |          |           |
|-----------------------------------------|------------|----------|-----------|-------------|----------|-----------|
|                                         | WT         |          |           | NAPE-PLD KO |          |           |
|                                         | Mean       | Std Dev  | Std Error | Mean        | Std Dev  | Std Error |
| <b><i>N</i>-acyl alanine</b>            |            |          |           |             |          |           |
| <i>N</i> -palmitoyl alanine             | 1.13E-11   | 6.00E-12 | 2.68E-12  | 7.14E-12    | 2.22E-12 | 9.07E-13  |
| <i>N</i> -stearoyl alanine              | 1.42E-11   | 6.78E-12 | 3.03E-12  | 1.00E-11    | 9.84E-13 | 4.02E-13  |
| <i>N</i> -oleoyl alanine                | 3.30E-12   | 2.10E-12 | 9.41E-13  | 2.09E-12    | 6.23E-13 | 2.54E-13  |
| <i>N</i> -linoleoyl alanine             | BDL        |          |           | BDL         |          |           |
| <i>N</i> -arachidonoyl alanine          | BDL        |          |           | BDL         |          |           |
| <i>N</i> -docosahexaenoyl alanine       | BDL        |          |           | BDL         |          |           |
| <b><i>N</i>-acyl dopamine</b>           |            |          |           |             |          |           |
| <i>N</i> -oleoyl dopamine               | BDL        |          |           | BDL         |          |           |
| <i>N</i> -arachidonoyl dopamine         | BDL        |          |           | BDL         |          |           |
| <b><i>N</i>-acyl ethanolamine</b>       |            |          |           |             |          |           |
| <i>N</i> -palmitoyl ethanolamine        | 2.99E-10   | 6.31E-11 | 2.82E-11  | 1.54E-10    | 8.54E-12 | 3.49E-12  |
| <i>N</i> -stearoyl ethanolamine         | 3.13E-10   | 8.12E-11 | 3.63E-11  | 1.18E-10    | 1.57E-11 | 6.42E-12  |
| <i>N</i> -oleoyl ethanolamine           | 5.54E-10   | 6.63E-11 | 2.97E-11  | 3.70E-10    | 5.23E-11 | 2.14E-11  |
| <i>N</i> -linoleoyl ethanolamine        | 7.47E-11   | 8.63E-12 | 3.86E-12  | 1.47E-11    | 2.12E-12 | 8.66E-13  |
| <i>N</i> -arachidonoyl ethanolamine     | 1.68E-11   | 3.10E-12 | 1.39E-12  | 5.71E-12    | 7.60E-13 | 3.10E-13  |
| <i>N</i> -docosahexaenoyl ethanolamine  | 1.26E-10   | 2.95E-11 | 1.32E-11  | 2.83E-11    | 4.69E-12 | 1.92E-12  |
| <b><i>N</i>-acyl GABA</b>               |            |          |           |             |          |           |
| <i>N</i> -palmitoyl GABA                | 1.21E-11   | 5.55E-12 | 2.48E-12  | 9.50E-12    | 2.76E-12 | 1.13E-12  |
| <i>N</i> -stearoyl GABA                 | 1.17E-11   | 5.62E-12 | 2.51E-12  | 8.52E-12    | 1.79E-12 | 7.29E-13  |
| <i>N</i> -oleoyl GABA                   | 5.37E-12   | 2.50E-12 | 1.12E-12  | 3.75E-12    | 7.92E-13 | 3.23E-13  |
| <i>N</i> -linoleoyl GABA                | 1.20E-12   | 6.91E-13 | 3.09E-13  | 7.14E-13    | 3.22E-13 | 1.31E-13  |
| <i>N</i> -arachidonoyl GABA             | 7.81E-12   | 2.03E-12 | 9.08E-13  | 6.94E-12    | 1.82E-12 | 7.41E-13  |
| <i>N</i> -docosahexaenoyl GABA          | 7.55E-11   | 4.05E-11 | 1.81E-11  | 5.16E-11    | 1.49E-11 | 6.09E-12  |
| <b><i>N</i>-acyl glycine</b>            |            |          |           |             |          |           |
| <i>N</i> -palmitoyl glycine             | 4.71E-11   | 1.69E-11 | 7.57E-12  | 3.95E-11    | 4.71E-12 | 1.92E-12  |
| <i>N</i> -stearoyl glycine              | 1.82E-11   | 8.31E-12 | 3.72E-12  | 1.35E-11    | 2.87E-12 | 1.17E-12  |
| <i>N</i> -oleoyl glycine                | 1.21E-11   | 2.98E-12 | 1.33E-12  | 1.03E-11    | 1.70E-12 | 6.96E-13  |
| <i>N</i> -linoleoyl glycine             | 1.82E-12   | 1.26E-12 | 5.62E-13  | 1.38E-12    | 9.68E-13 | 3.95E-13  |
| <i>N</i> -arachidonoyl glycine          | 8.17E-12   | 1.22E-12 | 5.45E-13  | 1.02E-11    | 1.95E-12 | 7.98E-13  |
| <i>N</i> -docosahexaenoyl glycine       | 7.22E-12   | 2.71E-12 | 1.21E-12  | 7.13E-12    | 1.26E-12 | 5.14E-13  |
| <b><i>N</i>-acyl leucine</b>            |            |          |           |             |          |           |
| <i>N</i> -palmitoyl leucine             | 9.76E-13   | 5.36E-13 | 2.40E-13  | 8.10E-13    | 1.53E-13 | 6.23E-14  |
| <i>N</i> -stearoyl leucine              | 4.93E-13   | 2.12E-13 | 9.50E-14  | 3.72E-13    | 1.15E-13 | 4.69E-14  |
| <i>N</i> -oleoyl leucine                | 3.86E-13   | 1.65E-13 | 7.37E-14  | 4.05E-13    | 1.52E-13 | 6.19E-14  |
| <i>N</i> -linoleoyl leucine             | BDL        |          |           | BDL         |          |           |
| <i>N</i> -docosahexaenoyl leucine       | BDL        |          |           | BDL         |          |           |
| <b><i>N</i>-acyl methionine</b>         |            |          |           |             |          |           |
| <i>N</i> -palmitoyl methionine          | BDL        |          |           | BDL         |          |           |
| <i>N</i> -stearoyl methionine           | 1.54E-12   | 4.20E-13 | 1.88E-13  | 1.19E-12    | 3.75E-13 | 1.53E-13  |
| <i>N</i> -oleoyl methionine             | 8.91E-13   | 3.32E-13 | 1.49E-13  | BDL         |          |           |
| <i>N</i> -linoleoyl methionine          | BDL        |          |           | BDL         |          |           |
| <i>N</i> -arachidonoyl methionine       | BDL        |          |           | BDL         |          |           |
| <i>N</i> -docosahexaenoyl methionine    | BDL        |          |           | BDL         |          |           |
| <b><i>N</i>-acyl phenylalanine</b>      |            |          |           |             |          |           |
| <i>N</i> -palmitoyl phenylalanine       | 4.01E-12   | 1.17E-12 | 5.22E-13  | 4.10E-12    | 5.48E-13 | 2.24E-13  |
| <i>N</i> -stearoyl phenylalanine        | 2.36E-12   | 5.43E-13 | 2.43E-13  | 2.30E-12    | 3.49E-13 | 1.43E-13  |
| <i>N</i> -oleoyl phenylalanine          | 2.43E-12   | 5.54E-13 | 2.48E-13  | 2.88E-12    | 4.06E-13 | 1.66E-13  |
| <i>N</i> -linoleoyl phenylalanine       | BDL        |          |           | BDL         |          |           |
| <i>N</i> -arachidonoyl phenylalanine    | 1.36E-12   | 1.09E-12 | 4.86E-13  | 7.92E-13    | 3.35E-13 | 1.37E-13  |
| <i>N</i> -docosahexaenoyl phenylalanine | 1.33E-12   | 4.92E-13 | 2.20E-13  | 1.31E-12    | 4.76E-13 | 1.94E-13  |



**Supplemental Table 5: Continued**

|                                      | Cerebellum |          |           |             |          |           |
|--------------------------------------|------------|----------|-----------|-------------|----------|-----------|
|                                      | WT         |          |           | NAPE-PLD KO |          |           |
|                                      | Mean       | Std Dev  | Std Error | Mean        | Std Dev  | Std Error |
| <b>N-acyl proline</b>                |            |          |           |             |          |           |
| <i>N</i> -palmitoyl proline          | 3.56E-11   | 1.24E-11 | 5.53E-12  | 2.81E-11    | 8.34E-12 | 3.40E-12  |
| <i>N</i> -stearoyl proline           | 2.06E-11   | 8.04E-12 | 3.60E-12  | 1.48E-11    | 2.14E-12 | 8.73E-13  |
| <i>N</i> -oleoyl proline             | 3.43E-11   | 1.61E-11 | 7.20E-12  | 2.50E-11    | 2.52E-12 | 1.03E-12  |
| <i>N</i> -linoleoyl proline          | BDL        |          |           | BDL         |          |           |
| <i>N</i> -arachidonoyl proline       | BDL        |          |           | BDL         |          |           |
| <i>N</i> -docosahexaenoyl proline    | BDL        |          |           | BDL         |          |           |
| <b>N-acyl serine</b>                 |            |          |           |             |          |           |
| <i>N</i> -palmitoyl serine           | 4.93E-11   | 1.04E-11 | 4.63E-12  | 4.29E-11    | 4.82E-12 | 1.97E-12  |
| <i>N</i> -stearoyl serine            | 4.35E-11   | 7.33E-12 | 3.28E-12  | 3.73E-11    | 3.86E-12 | 1.58E-12  |
| <i>N</i> -oleoyl serine              | 4.26E-10   | 1.09E-10 | 4.86E-11  | 3.60E-10    | 3.05E-11 | 1.24E-11  |
| <i>N</i> -linoleoyl serine           | 4.93E-11   | 1.58E-11 | 7.04E-12  | 3.79E-11    | 8.67E-12 | 3.54E-12  |
| <i>N</i> -arachidonoyl serine        | 2.17E-12   | 6.41E-13 | 2.87E-13  | 1.43E-12    | 5.36E-13 | 2.19E-13  |
| <i>N</i> -docosahexaenoyl serine     | 2.46E-11   | 1.44E-11 | 6.44E-12  | 1.75E-11    | 6.47E-12 | 2.64E-12  |
| <b>N-acyl taurine</b>                |            |          |           |             |          |           |
| <i>N</i> -arachidonoyl taurine       | 1.92E-10   | 3.01E-11 | 1.35E-11  | 2.18E-10    | 3.77E-11 | 1.54E-11  |
| <b>N-acyl tryptophan</b>             |            |          |           |             |          |           |
| <i>N</i> -palmitoyl tryptophan       | 3.97E-12   | 2.96E-12 | 1.33E-12  | 2.88E-12    | 5.56E-13 | 2.27E-13  |
| <i>N</i> -stearoyl tryptophan        | 7.46E-12   | 4.09E-12 | 1.83E-12  | 4.16E-12    | 1.44E-12 | 5.87E-13  |
| <i>N</i> -oleoyl tryptophan          | BDL        |          |           | BDL         |          |           |
| <i>N</i> -linoleoyl tryptophan       | 3.05E-12   | 1.39E-12 | 6.23E-13  | 3.31E-12    | 1.84E-13 | 7.51E-14  |
| <i>N</i> -arachidonoyl tryptophan    | BDL        |          |           | BDL         |          |           |
| <i>N</i> -docosahexaenoyl tryptophan | BDL        |          |           | BDL         |          |           |
| <b>N-acyl tyrosine</b>               |            |          |           |             |          |           |
| <i>N</i> -palmitoyl tyrosine         | 1.57E-12   | 2.76E-13 | 1.23E-13  | 1.31E-12    | 2.33E-13 | 9.51E-14  |
| <i>N</i> -stearoyl tyrosine          | 1.06E-12   | 2.50E-13 | 1.12E-13  | 9.05E-13    | 3.47E-13 | 1.42E-13  |
| <i>N</i> -oleoyl tyrosine            | 1.47E-12   | 5.04E-13 | 2.25E-13  | 1.26E-12    | 2.03E-13 | 8.27E-14  |
| <i>N</i> -linoleoyl tyrosine         | BDL        |          |           | BDL         |          |           |
| <i>N</i> -arachidonoyl tyrosine      | 9.49E-12   | 1.60E-12 | 7.16E-13  | 1.14E-11    | 2.81E-12 | 1.15E-12  |
| <i>N</i> -docosahexaenoyl tyrosine   | 1.11E-12   | 3.03E-13 | 1.35E-13  | 1.10E-12    | 4.42E-13 | 1.80E-13  |
| <b>N-acyl valine</b>                 |            |          |           |             |          |           |
| <i>N</i> -palmitoyl valine           | 4.01E-12   | 2.33E-12 | 1.04E-12  | 3.48E-12    | 1.87E-12 | 7.62E-13  |
| <i>N</i> -stearoyl valine            | 1.20E-12   | 4.60E-13 | 2.06E-13  | 1.35E-12    | 5.78E-13 | 2.36E-13  |
| <i>N</i> -oleoyl valine              | 3.15E-12   | 8.31E-13 | 3.72E-13  | 2.43E-12    | 7.26E-13 | 2.96E-13  |
| <i>N</i> -nervonoyl valine           | BDL        |          |           | BDL         |          |           |
| <i>N</i> -linoleoyl valine           | BDL        |          |           | BDL         |          |           |
| <i>N</i> -docosahexaenoyl valine     | BDL        |          |           | BDL         |          |           |
| <b>Free Fatty Acids</b>              |            |          |           |             |          |           |
| Linoleic acid                        | 1.32E-08   | 3.05E-09 | 1.36E-09  | 1.16E-08    | 1.45E-09 | 5.94E-10  |
| Arachidonic acid                     | 2.60E-09   | 6.38E-10 | 2.85E-10  | 2.46E-09    | 1.16E-10 | 4.73E-11  |
| <b>2-acyl-<i>sn</i>-glycerol</b>     |            |          |           |             |          |           |
| 2-arachidonoyl- <i>sn</i> -glycerol  | 1.21E-08   | 3.09E-09 | 1.38E-09  | 1.64E-08    | 5.17E-09 | 2.11E-09  |
| 2-linoleoyl- <i>sn</i> -glycerol     | 9.53E-10   | 2.98E-10 | 1.33E-10  | 6.54E-10    | 6.46E-11 | 2.64E-11  |
| 2-oleoyl- <i>sn</i> -glycerol        | 9.08E-09   | 2.95E-09 | 1.32E-09  | 7.68E-09    | 6.73E-10 | 2.75E-10  |
| <b>Prostaglandins</b>                |            |          |           |             |          |           |
| PGE <sub>2</sub>                     | 3.80E-10   | 7.55E-11 | 3.38E-11  | 4.23E-10    | 8.81E-11 | 3.60E-11  |
| PGF <sub>2α</sub>                    | 1.53E-10   | 4.03E-11 | 1.80E-11  | 1.59E-10    | 3.48E-11 | 1.42E-11  |

**Supplemental Table 6: List of lipids in the cerebellum significantly affected by NAPE-PLD deletion**

| Cerebellum Significant Differences in One-Way ANOVA |         |       |                            |                        |
|-----------------------------------------------------|---------|-------|----------------------------|------------------------|
| Lipid                                               | F       | p     | Direction (relative to WT) | Magnitude (x WT level) |
| <i>N</i> -palmitoyl ethanolamine                    | 31.547  | 0     | ↓                          | 0.52                   |
| <i>N</i> -stearoyl ethanolamine                     | 33.817  | 0     | ↓                          | 0.38                   |
| <i>N</i> -oleoyl ethanolamine                       | 26.454  | 0.001 | ↓                          | 0.69                   |
| <i>N</i> -linoleoyl ethanolamine                    | 275.918 | 0     | ↓                          | 0.2                    |
| <i>N</i> -arachidonoyl ethanolamine                 | 73.245  | 0     | ↓                          | 0.34                   |
| <i>N</i> -docosahexaenoyl ethanolamine              | 65.333  | 0     | ↓                          | 0.22                   |
| <i>N</i> -arachidonoyl glycine                      | 4.244   | 0.069 | ↑                          | 1.25                   |
| <i>N</i> -arachidonoyl serine                       | 4.395   | 0.065 | ↓                          | 0.67                   |
| <i>N</i> -stearoyl tryptophan                       | 3.447   | 0.096 | ↓                          | 0.56                   |
| 2-linoleoyl- <i>sn</i> -glycerol                    | 5.833   | 0.039 | ↓                          | 0.69                   |

**Supplemental Table 7: Lipid levels (moles per gram tissue) in the thalamus of WT and NAPE-PLD KO mice**

|                                         | Thalamus |          |           |             |          |           |
|-----------------------------------------|----------|----------|-----------|-------------|----------|-----------|
|                                         | WT       |          |           | NAPE-PLD KO |          |           |
|                                         | Mean     | Std Dev  | Std Error | Mean        | Std Dev  | Std Error |
| <b>N-acyl alanine</b>                   |          |          |           |             |          |           |
| <i>N</i> -palmitoyl alanine             | 3.68E-12 | 1.10E-12 | 4.49E-13  | 2.90E-12    | 7.90E-13 | 3.23E-13  |
| <i>N</i> -stearoyl alanine              | 2.04E-12 | 4.21E-13 | 1.72E-13  | 1.98E-12    | 8.90E-13 | 3.63E-13  |
| <i>N</i> -oleoyl alanine                | 9.60E-13 | 3.67E-13 | 1.50E-13  | 9.32E-13    | 2.92E-13 | 1.19E-13  |
| <i>N</i> -linoleoyl alanine             | BDL      |          |           | BDL         |          |           |
| <i>N</i> -arachidonoyl alanine          | BDL      |          |           | BDL         |          |           |
| <i>N</i> -docosahexaenoyl alanine       | BDL      |          |           | BDL         |          |           |
| <b>N-acyl dopamine</b>                  |          |          |           |             |          |           |
| <i>N</i> -oleoyl dopamine               | BDL      |          |           | BDL         |          |           |
| <i>N</i> -arachidonoyl dopamine         | BDL      |          |           | BDL         |          |           |
| <b>N-acyl ethanolamine</b>              |          |          |           |             |          |           |
| <i>N</i> -palmitoyl ethanolamine        | 2.10E-10 | 3.78E-11 | 1.54E-11  | 1.40E-10    | 2.68E-11 | 1.10E-11  |
| <i>N</i> -stearoyl ethanolamine         | 1.42E-10 | 1.58E-11 | 6.43E-12  | 4.82E-11    | 5.95E-12 | 2.43E-12  |
| <i>N</i> -oleoyl ethanolamine           | 2.28E-10 | 4.24E-11 | 1.73E-11  | 1.91E-10    | 3.01E-11 | 1.23E-11  |
| <i>N</i> -linoleoyl ethanolamine        | 4.87E-11 | 7.84E-12 | 3.20E-12  | 1.40E-11    | 2.32E-12 | 9.49E-13  |
| <i>N</i> -arachidonoyl ethanolamine     | 2.25E-11 | 3.44E-12 | 1.41E-12  | 1.19E-11    | 1.93E-12 | 7.87E-13  |
| <i>N</i> -docosahexaenoyl ethanolamine  | 8.37E-11 | 1.36E-11 | 5.55E-12  | 2.94E-11    | 2.17E-12 | 8.87E-13  |
| <b>N-acyl GABA</b>                      |          |          |           |             |          |           |
| <i>N</i> -palmitoyl GABA                | 7.34E-12 | 1.38E-12 | 5.64E-13  | 7.39E-12    | 4.52E-13 | 1.84E-13  |
| <i>N</i> -stearoyl GABA                 | 8.52E-12 | 3.24E-12 | 1.32E-12  | 7.84E-12    | 7.24E-13 | 2.96E-13  |
| <i>N</i> -oleoyl GABA                   | 2.30E-12 | 4.42E-13 | 1.80E-13  | 2.33E-12    | 1.75E-13 | 7.14E-14  |
| <i>N</i> -linoleoyl GABA                | BDL      |          |           | BDL         |          |           |
| <i>N</i> -arachidonoyl GABA             | 1.83E-11 | 3.70E-12 | 1.51E-12  | 1.83E-11    | 1.38E-12 | 5.63E-13  |
| <i>N</i> -docosahexaenoyl GABA          | 1.87E-11 | 5.24E-12 | 2.14E-12  | 1.78E-11    | 4.45E-12 | 1.82E-12  |
| <b>N-acyl glycine</b>                   |          |          |           |             |          |           |
| <i>N</i> -palmitoyl glycine             | 4.22E-11 | 2.06E-12 | 8.41E-13  | 4.35E-11    | 5.46E-12 | 2.23E-12  |
| <i>N</i> -stearoyl glycine              | 1.12E-11 | 1.77E-12 | 7.23E-13  | 1.01E-11    | 1.90E-12 | 7.74E-13  |
| <i>N</i> -oleoyl glycine                | 1.40E-11 | 1.48E-12 | 6.02E-13  | 1.52E-11    | 1.96E-12 | 7.98E-13  |
| <i>N</i> -linoleoyl glycine             | 3.51E-12 | 1.29E-12 | 5.25E-13  | 2.35E-12    | 9.54E-13 | 3.90E-13  |
| <i>N</i> -arachidonoyl glycine          | 2.05E-11 | 3.04E-12 | 1.24E-12  | 2.43E-11    | 3.56E-12 | 1.45E-12  |
| <i>N</i> -docosahexaenoyl glycine       | 3.06E-12 | 1.18E-12 | 4.80E-13  | 4.04E-12    | 9.16E-13 | 3.74E-13  |
| <b>N-acyl leucine</b>                   |          |          |           |             |          |           |
| <i>N</i> -palmitoyl leucine             | 2.37E-12 | 4.80E-13 | 1.96E-13  | 2.35E-12    | 3.54E-13 | 1.45E-13  |
| <i>N</i> -stearoyl leucine              | 3.49E-12 | 7.13E-13 | 2.91E-13  | 3.54E-12    | 4.89E-13 | 2.00E-13  |
| <i>N</i> -oleoyl leucine                | 1.83E-12 | 5.25E-13 | 2.14E-13  | 2.20E-12    | 4.38E-13 | 1.79E-13  |
| <i>N</i> -linoleoyl leucine             | 3.26E-13 | 1.59E-13 | 6.48E-14  | 4.10E-13    | 2.62E-13 | 1.07E-13  |
| <i>N</i> -docosahexaenoyl leucine       | 1.38E-12 | 4.27E-13 | 1.74E-13  | 1.26E-12    | 3.57E-13 | 1.46E-13  |
| <b>N-acyl methionine</b>                |          |          |           |             |          |           |
| <i>N</i> -palmitoyl methionine          | 3.64E-12 | 1.24E-12 | 5.06E-13  | 4.77E-12    | 1.04E-12 | 4.24E-13  |
| <i>N</i> -stearoyl methionine           | 1.69E-12 | 3.79E-13 | 1.55E-13  | 1.70E-12    | 6.01E-13 | 2.45E-13  |
| <i>N</i> -oleoyl methionine             | 2.21E-12 | 1.21E-12 | 4.93E-13  | 3.04E-12    | 1.20E-12 | 4.89E-13  |
| <i>N</i> -linoleoyl methionine          | BDL      |          |           | BDL         |          |           |
| <i>N</i> -arachidonoyl methionine       | BDL      |          |           | BDL         |          |           |
| <i>N</i> -docosahexaenoyl methionine    | BDL      |          |           | BDL         |          |           |
| <b>N-acyl phenylalanine</b>             |          |          |           |             |          |           |
| <i>N</i> -palmitoyl phenylalanine       | 3.75E-12 | 1.30E-12 | 5.32E-13  | 3.89E-12    | 6.89E-13 | 2.81E-13  |
| <i>N</i> -stearoyl phenylalanine        | 2.66E-12 | 8.29E-13 | 3.38E-13  | 2.21E-12    | 4.89E-13 | 2.00E-13  |
| <i>N</i> -oleoyl phenylalanine          | 1.01E-12 | 3.83E-13 | 1.56E-13  | 1.07E-12    | 2.53E-13 | 1.03E-13  |
| <i>N</i> -linoleoyl phenylalanine       | BDL      |          |           | BDL         |          |           |
| <i>N</i> -arachidonoyl phenylalanine    | 7.90E-13 | 3.03E-13 | 1.24E-13  | 9.39E-13    | 3.89E-13 | 1.59E-13  |
| <i>N</i> -docosahexaenoyl phenylalanine | 7.25E-13 | 2.99E-13 | 1.22E-13  | 9.12E-13    | 3.42E-13 | 1.40E-13  |

## Supplemental Table 7: Continued

|                                      | Thalamus |          |           |             |          |           |
|--------------------------------------|----------|----------|-----------|-------------|----------|-----------|
|                                      | WT       |          |           | NAPE-PLD KO |          |           |
|                                      | Mean     | Std Dev  | Std Error | Mean        | Std Dev  | Std Error |
| <b>N-acyl proline</b>                |          |          |           |             |          |           |
| <i>N</i> -palmitoyl proline          | 9.64E-13 | 2.85E-13 | 1.16E-13  | 1.04E-12    | 4.43E-13 | 1.81E-13  |
| <i>N</i> -stearoyl proline           | 2.38E-13 | 3.94E-14 | 1.61E-14  | 2.65E-13    | 5.87E-14 | 2.39E-14  |
| <i>N</i> -oleoyl proline             | BDL      |          |           | BDL         |          |           |
| <i>N</i> -linoleoyl proline          | BDL      |          |           | BDL         |          |           |
| <i>N</i> -arachidonoyl proline       | BDL      |          |           | BDL         |          |           |
| <i>N</i> -docosahexaenoyl proline    | BDL      |          |           | BDL         |          |           |
| <b>N-acyl serine</b>                 |          |          |           |             |          |           |
| <i>N</i> -palmitoyl serine           | 8.53E-11 | 2.37E-12 | 9.67E-13  | 8.01E-11    | 8.27E-12 | 3.38E-12  |
| <i>N</i> -stearoyl serine            | 6.78E-11 | 6.09E-12 | 2.49E-12  | 5.01E-11    | 6.20E-12 | 2.53E-12  |
| <i>N</i> -oleoyl serine              | 4.46E-10 | 2.28E-11 | 9.32E-12  | 4.37E-10    | 5.09E-11 | 2.08E-11  |
| <i>N</i> -linoleoyl serine           | 4.06E-11 | 5.93E-12 | 2.42E-12  | 4.04E-11    | 4.26E-12 | 1.74E-12  |
| <i>N</i> -arachidonoyl serine        | 1.13E-12 | 5.31E-13 | 2.17E-13  | 1.46E-12    | 4.07E-13 | 1.66E-13  |
| <i>N</i> -docosahexaenoyl serine     | 1.24E-11 | 3.31E-12 | 1.35E-12  | 1.20E-11    | 2.33E-12 | 9.52E-13  |
| <b>N-acyl taurine</b>                |          |          |           |             |          |           |
| <i>N</i> -arachidonoyl taurine       | 3.23E-10 | 3.44E-11 | 1.40E-11  | 3.61E-10    | 3.35E-11 | 1.37E-11  |
| <b>N-acyl tryptophan</b>             |          |          |           |             |          |           |
| <i>N</i> -palmitoyl tryptophan       | 2.39E-12 | 9.08E-13 | 3.71E-13  | 1.70E-12    | 6.49E-13 | 2.65E-13  |
| <i>N</i> -stearoyl tryptophan        | 3.57E-12 | 8.33E-13 | 3.40E-13  | 2.68E-12    | 3.29E-13 | 1.34E-13  |
| <i>N</i> -oleoyl tryptophan          | BDL      |          |           | BDL         |          |           |
| <i>N</i> -linoleoyl tryptophan       | BDL      |          |           | BDL         |          |           |
| <i>N</i> -arachidonoyl tryptophan    | BDL      |          |           | BDL         |          |           |
| <i>N</i> -docosahexaenoyl tryptophan | BDL      |          |           | BDL         |          |           |
| <b>N-acyl tyrosine</b>               |          |          |           |             |          |           |
| <i>N</i> -palmitoyl tyrosine         | 2.16E-12 | 2.82E-13 | 1.15E-13  | 2.38E-12    | 2.75E-13 | 1.12E-13  |
| <i>N</i> -stearoyl tyrosine          | 2.42E-13 | 8.08E-14 | 3.30E-14  | 2.17E-13    | 8.11E-14 | 3.31E-14  |
| <i>N</i> -oleoyl tyrosine            | 1.04E-12 | 4.38E-13 | 1.79E-13  | 1.43E-12    | 4.04E-13 | 1.65E-13  |
| <i>N</i> -linoleoyl tyrosine         | BDL      |          |           | BDL         |          |           |
| <i>N</i> -arachidonoyl tyrosine      | 1.57E-12 | 3.51E-13 | 1.43E-13  | 1.19E-12    | 3.03E-13 | 1.24E-13  |
| <i>N</i> -docosahexaenoyl tyrosine   | 3.40E-13 | 1.62E-13 | 6.62E-14  | 3.51E-13    | 1.99E-13 | 8.11E-14  |
| <b>N-acyl valine</b>                 |          |          |           |             |          |           |
| <i>N</i> -palmitoyl valine           | 1.98E-12 | 3.08E-13 | 1.26E-13  | 2.40E-12    | 4.18E-13 | 1.71E-13  |
| <i>N</i> -stearoyl valine            | 1.68E-12 | 7.30E-13 | 2.98E-13  | 1.46E-12    | 2.86E-13 | 1.17E-13  |
| <i>N</i> -oleoyl valine              | 2.29E-12 | 8.29E-13 | 3.38E-13  | 2.64E-12    | 5.36E-13 | 2.19E-13  |
| <i>N</i> -nervonoyl valine           | BDL      |          |           | BDL         |          |           |
| <i>N</i> -linoleoyl valine           | BDL      |          |           | BDL         |          |           |
| <i>N</i> -docosahexaenoyl valine     | BDL      |          |           | BDL         |          |           |
| <b>Free Fatty Acids</b>              |          |          |           |             |          |           |
| Linoleic acid                        | 2.74E-09 | 7.59E-10 | 3.10E-10  | 1.95E-09    | 5.30E-10 | 2.16E-10  |
| Arachidonic acid                     | 1.28E-07 | 1.09E-08 | 4.46E-09  | 1.23E-07    | 1.12E-08 | 4.58E-09  |
| <b>2-acyl-<i>sn</i>-glycerol</b>     |          |          |           |             |          |           |
| 2-arachidonoyl- <i>sn</i> -glycerol  | 2.80E-09 | 4.16E-10 | 1.70E-10  | 3.14E-09    | 5.90E-10 | 2.41E-10  |
| 2-linoleoyl- <i>sn</i> -glycerol     | 6.73E-10 | 1.62E-10 | 6.60E-11  | 5.20E-10    | 1.01E-10 | 4.14E-11  |
| 2-oleoyl- <i>sn</i> -glycerol        | 8.29E-08 | 1.23E-08 | 5.03E-09  | 8.21E-08    | 1.83E-08 | 7.46E-09  |
| <b>Prostaglandins</b>                |          |          |           |             |          |           |
| PGE <sub>2</sub>                     | 2.62E-10 | 2.18E-11 | 8.90E-12  | 3.89E-10    | 4.16E-11 | 1.70E-11  |
| PGF <sub>2α</sub>                    | 1.96E-10 | 2.07E-11 | 8.45E-12  | 2.57E-10    | 3.13E-11 | 1.28E-11  |

**Supplemental Table 8: List of lipids in the thalamus significantly affected by NAPE-PLD deletion**

| Thalamus Significant Differences in One-Way ANOVA |         |       |                            |                        |
|---------------------------------------------------|---------|-------|----------------------------|------------------------|
| Lipid                                             | F       | p     | Direction (relative to WT) | Magnitude (x WT level) |
| <i>N</i> -palmitoyl ethanolamine                  | 13.513  | 0.004 | ↓                          | 0.67                   |
| <i>N</i> -stearoyl ethanolamine                   | 186.804 | 0     | ↓                          | 0.34                   |
| <i>N</i> -linoleoyl ethanolamine                  | 108.142 | 0     | ↓                          | 0.29                   |
| <i>N</i> -arachidonoyl ethanolamine               | 43.313  | 0     | ↓                          | 0.53                   |
| <i>N</i> -docosahexaenoyl ethanolamine            | 93.228  | 0     | ↓                          | 0.35                   |
| <i>N</i> -arachidonoyl glycine                    | 4.007   | 0.073 | ↑                          | 1.19                   |
| <i>N</i> -stearoyl serine                         | 24.819  | 0.001 | ↓                          | 0.74                   |
| <i>N</i> -arachidonoyl taurine                    | 3.801   | 0.08  | ↑                          | 1.12                   |
| <i>N</i> -stearoyl tryptophan                     | 5.967   | 0.035 | ↓                          | 0.76                   |
| <i>N</i> -arachidonoyl tyrosine                   | 4.051   | 0.072 | ↓                          | 0.77                   |
| <i>N</i> -palmitoyl valine                        | 3.931   | 0.076 | ↑                          | 1.2                    |
| Linoleic acid                                     | 4.409   | 0.062 | ↓                          | 0.71                   |
| 2-linoleoyl- <i>sn</i> -glycerol                  | 3.835   | 0.079 | ↓                          | 0.77                   |
| PGE <sub>2</sub>                                  | 44.176  | 0     | ↑                          | 1.49                   |
| PGF <sub>2α</sub>                                 | 15.706  | 0.003 | ↑                          | 1.31                   |

**Supplemental Table 9: Lipid levels (moles per gram tissue) in the cortex  
of WT and NAPE-PLD KO mice**

|                                         | Cortex   |          |           |             |          |           |
|-----------------------------------------|----------|----------|-----------|-------------|----------|-----------|
|                                         | WT       |          |           | NAPE-PLD KO |          |           |
|                                         | Mean     | Std Dev  | Std Error | Mean        | Std Dev  | Std Error |
| <b><i>N</i>-acyl alanine</b>            |          |          |           |             |          |           |
| <i>N</i> -palmitoyl alanine             | 1.31E-12 | 5.00E-13 | 2.04E-13  | 1.53E-12    | 4.38E-13 | 1.79E-13  |
| <i>N</i> -stearoyl alanine              | 2.98E-12 | 1.99E-12 | 8.13E-13  | 2.55E-12    | 6.32E-13 | 2.58E-13  |
| <i>N</i> -oleoyl alanine                | 4.47E-13 | 1.60E-13 | 6.55E-14  | 5.36E-13    | 7.10E-14 | 2.90E-14  |
| <i>N</i> -linoleoyl alanine             | BDL      |          |           | BDL         |          |           |
| <i>N</i> -arachidonoyl alanine          | BDL      |          |           | BDL         |          |           |
| <i>N</i> -docosahexaenoyl alanine       | BDL      |          |           | BDL         |          |           |
| <b><i>N</i>-acyl dopamine</b>           |          |          |           |             |          |           |
| <i>N</i> -oleoyl dopamine               | BDL      |          |           | BDL         |          |           |
| <i>N</i> -arachidonoyl dopamine         | BDL      |          |           | BDL         |          |           |
| <b><i>N</i>-acyl ethanolamine</b>       |          |          |           |             |          |           |
| <i>N</i> -palmitoyl ethanolamine        | 5.17E-11 | 4.40E-12 | 1.80E-12  | 4.12E-11    | 4.59E-12 | 1.88E-12  |
| <i>N</i> -stearoyl ethanolamine         | 4.32E-11 | 3.92E-12 | 1.60E-12  | 2.23E-11    | 3.64E-12 | 1.48E-12  |
| <i>N</i> -oleoyl ethanolamine           | 7.92E-11 | 7.86E-12 | 3.21E-12  | 6.29E-11    | 7.16E-12 | 2.92E-12  |
| <i>N</i> -linoleoyl ethanolamine        | 3.87E-11 | 4.65E-12 | 1.90E-12  | 8.84E-12    | 1.58E-12 | 6.43E-13  |
| <i>N</i> -arachidonoyl ethanolamine     | 1.33E-11 | 1.82E-12 | 7.43E-13  | 6.16E-12    | 9.40E-13 | 3.84E-13  |
| <i>N</i> -docosahexaenoyl ethanolamine  | 3.58E-11 | 4.48E-12 | 1.83E-12  | 1.38E-11    | 1.42E-12 | 5.79E-13  |
| <b><i>N</i>-acyl GABA</b>               |          |          |           |             |          |           |
| <i>N</i> -palmitoyl GABA                | 2.34E-12 | 2.94E-13 | 1.20E-13  | 2.61E-12    | 2.94E-13 | 1.20E-13  |
| <i>N</i> -stearoyl GABA                 | 3.83E-12 | 7.81E-13 | 3.19E-13  | 4.12E-12    | 5.29E-13 | 2.16E-13  |
| <i>N</i> -oleoyl GABA                   | 1.07E-12 | 1.46E-13 | 5.97E-14  | 9.95E-13    | 1.14E-13 | 4.66E-14  |
| <i>N</i> -linoleoyl GABA                | 2.64E-13 | 1.07E-13 | 4.35E-14  | 1.86E-13    | 1.26E-13 | 5.13E-14  |
| <i>N</i> -arachidonoyl GABA             | 1.45E-11 | 2.38E-12 | 9.71E-13  | 1.53E-11    | 2.53E-12 | 1.03E-12  |
| <i>N</i> -docosahexaenoyl GABA          | 7.38E-12 | 1.82E-12 | 7.42E-13  | 7.75E-12    | 2.49E-12 | 1.02E-12  |
| <b><i>N</i>-acyl glycine</b>            |          |          |           |             |          |           |
| <i>N</i> -palmitoyl glycine             | 1.42E-11 | 1.48E-12 | 6.06E-13  | 1.63E-11    | 8.08E-13 | 3.30E-13  |
| <i>N</i> -stearoyl glycine              | 6.02E-12 | 6.63E-13 | 2.71E-13  | 7.05E-12    | 8.93E-13 | 3.65E-13  |
| <i>N</i> -oleoyl glycine                | 6.44E-12 | 4.14E-13 | 1.69E-13  | 7.32E-12    | 2.78E-13 | 1.13E-13  |
| <i>N</i> -linoleoyl glycine             | 2.14E-12 | 2.54E-13 | 1.04E-13  | 1.92E-12    | 6.25E-13 | 2.55E-13  |
| <i>N</i> -arachidonoyl glycine          | 1.77E-11 | 9.39E-13 | 3.83E-13  | 2.25E-11    | 3.61E-12 | 1.47E-12  |
| <i>N</i> -docosahexaenoyl glycine       | 2.16E-12 | 4.04E-13 | 1.65E-13  | 2.86E-12    | 5.61E-13 | 2.29E-13  |
| <b><i>N</i>-acyl leucine</b>            |          |          |           |             |          |           |
| <i>N</i> -palmitoyl leucine             | 1.58E-12 | 3.51E-13 | 1.43E-13  | 1.52E-12    | 1.31E-13 | 5.37E-14  |
| <i>N</i> -stearoyl leucine              | 3.29E-12 | 5.96E-13 | 2.43E-13  | 3.28E-12    | 2.09E-13 | 8.55E-14  |
| <i>N</i> -oleoyl leucine                | 1.28E-12 | 3.10E-13 | 1.27E-13  | 1.21E-12    | 2.18E-13 | 8.89E-14  |
| <i>N</i> -linoleoyl leucine             | 2.38E-13 | 1.63E-13 | 6.64E-14  | 2.51E-13    | 9.27E-14 | 3.78E-14  |
| <i>N</i> -docosahexaenoyl leucine       | 9.06E-13 | 1.80E-13 | 7.35E-14  | 9.74E-13    | 1.05E-13 | 4.27E-14  |
| <b><i>N</i>-acyl methionine</b>         |          |          |           |             |          |           |
| <i>N</i> -palmitoyl methionine          | BDL      |          |           | BDL         |          |           |
| <i>N</i> -stearoyl methionine           | 1.06E-12 | 2.04E-13 | 8.34E-14  | 9.47E-13    | 2.37E-13 | 9.68E-14  |
| <i>N</i> -oleoyl methionine             | 9.44E-13 | 3.57E-13 | 1.46E-13  | 1.27E-12    | 4.86E-13 | 1.98E-13  |
| <i>N</i> -linoleoyl methionine          | BDL      |          |           | BDL         |          |           |
| <i>N</i> -arachidonoyl methionine       | BDL      |          |           | BDL         |          |           |
| <i>N</i> -docosahexaenoyl methionine    | BDL      |          |           | BDL         |          |           |
| <b><i>N</i>-acyl phenylalanine</b>      |          |          |           |             |          |           |
| <i>N</i> -palmitoyl phenylalanine       | 1.61E-12 | 6.15E-13 | 2.51E-13  | 2.20E-12    | 5.52E-13 | 2.26E-13  |
| <i>N</i> -stearoyl phenylalanine        | 1.93E-12 | 5.12E-13 | 2.09E-13  | 2.11E-12    | 2.51E-13 | 1.02E-13  |
| <i>N</i> -oleoyl phenylalanine          | 4.41E-13 | 9.84E-14 | 4.02E-14  | 6.01E-13    | 1.09E-13 | 4.47E-14  |
| <i>N</i> -linoleoyl phenylalanine       | BDL      |          |           | BDL         |          |           |
| <i>N</i> -arachidonoyl phenylalanine    | 3.40E-13 | 2.50E-13 | 1.02E-13  | 3.79E-13    | 1.91E-13 | 7.81E-14  |
| <i>N</i> -docosahexaenoyl phenylalanine | 4.08E-13 | 2.03E-13 | 8.27E-14  | 4.83E-13    | 2.17E-13 | 8.84E-14  |

## Supplemental Table 9: Continued

|                                      | Cortex   |          |           |             |          |           |
|--------------------------------------|----------|----------|-----------|-------------|----------|-----------|
|                                      | WT       |          |           | NAPE-PLD KO |          |           |
| <b>N-acyl proline</b>                | Mean     | Std Dev  | Std Error | Mean        | Std Dev  | Std Error |
| <i>N</i> -palmitoyl proline          | 3.92E-13 | 1.24E-13 | 5.06E-14  | 4.36E-13    | 5.59E-14 | 2.28E-14  |
| <i>N</i> -stearoyl proline           | 1.32E-13 | 5.73E-14 | 2.34E-14  | 1.65E-13    | 2.83E-14 | 1.15E-14  |
| <i>N</i> -oleoyl proline             | BDL      |          |           | BDL         |          |           |
| <i>N</i> -linoleoyl proline          | BDL      |          |           | BDL         |          |           |
| <i>N</i> -arachidonoyl proline       | BDL      |          |           | BDL         |          |           |
| <i>N</i> -docosahexaenoyl proline    | BDL      |          |           | BDL         |          |           |
| <b>N-acyl serine</b>                 |          |          |           |             |          |           |
| <i>N</i> -palmitoyl serine           | 3.23E-11 | 1.59E-12 | 6.49E-13  | 3.16E-11    | 2.64E-12 | 1.08E-12  |
| <i>N</i> -stearoyl serine            | 3.01E-11 | 2.94E-12 | 1.20E-12  | 2.78E-11    | 1.70E-12 | 6.95E-13  |
| <i>N</i> -oleoyl serine              | 1.24E-10 | 1.77E-11 | 7.23E-12  | 1.46E-10    | 1.77E-11 | 7.22E-12  |
| <i>N</i> -linoleoyl serine           | 1.19E-11 | 2.62E-12 | 1.07E-12  | 1.33E-11    | 1.85E-12 | 7.55E-13  |
| <i>N</i> -arachidonoyl serine        | 8.60E-13 | 1.60E-13 | 6.55E-14  | 9.79E-13    | 1.52E-13 | 6.21E-14  |
| <i>N</i> -docosahexaenoyl serine     | 9.41E-12 | 2.85E-12 | 1.16E-12  | 8.38E-12    | 1.82E-12 | 7.44E-13  |
| <b>N-acyl taurine</b>                |          |          |           |             |          |           |
| <i>N</i> -arachidonoyl taurine       | 8.06E-10 | 6.60E-11 | 2.69E-11  | 7.61E-10    | 8.51E-11 | 3.48E-11  |
| <b>N-acyl tryptophan</b>             |          |          |           |             |          |           |
| <i>N</i> -palmitoyl tryptophan       | 8.49E-13 | 3.29E-13 | 1.34E-13  | 1.08E-12    | 4.56E-13 | 1.86E-13  |
| <i>N</i> -stearoyl tryptophan        | 1.93E-12 | 6.64E-13 | 2.71E-13  | 2.10E-12    | 2.64E-13 | 1.08E-13  |
| <i>N</i> -oleoyl tryptophan          | BDL      |          |           | BDL         |          |           |
| <i>N</i> -linoleoyl tryptophan       | BDL      |          |           | BDL         |          |           |
| <i>N</i> -arachidonoyl tryptophan    | BDL      |          |           | BDL         |          |           |
| <i>N</i> -docosahexaenoyl tryptophan | BDL      |          |           | BDL         |          |           |
| <b>N-acyl tyrosine</b>               |          |          |           |             |          |           |
| <i>N</i> -palmitoyl tyrosine         | 9.43E-13 | 3.71E-13 | 1.52E-13  | 1.13E-12    | 4.04E-13 | 1.65E-13  |
| <i>N</i> -stearoyl tyrosine          | 3.36E-13 | 4.98E-14 | 2.03E-14  | 2.60E-13    | 7.87E-14 | 3.21E-14  |
| <i>N</i> -oleoyl tyrosine            | 5.67E-13 | 3.59E-13 | 1.47E-13  | 6.50E-13    | 1.55E-13 | 6.32E-14  |
| <i>N</i> -linoleoyl tyrosine         | BDL      |          |           | BDL         |          |           |
| <i>N</i> -arachidonoyl tyrosine      | 5.94E-13 | 2.05E-13 | 8.36E-14  | 8.59E-13    | 2.42E-13 | 9.90E-14  |
| <i>N</i> -docosahexaenoyl tyrosine   | 1.71E-13 | 8.08E-14 | 3.30E-14  | 2.65E-13    | 8.24E-14 | 3.36E-14  |
| <b>N-acyl valine</b>                 |          |          |           |             |          |           |
| <i>N</i> -palmitoyl valine           | 1.14E-12 | 4.68E-13 | 1.91E-13  | 1.05E-12    | 2.32E-13 | 9.48E-14  |
| <i>N</i> -stearoyl valine            | 9.35E-13 | 3.12E-13 | 1.28E-13  | 8.93E-13    | 1.16E-13 | 4.74E-14  |
| <i>N</i> -oleoyl valine              | 1.17E-12 | 3.57E-13 | 1.46E-13  | 1.15E-12    | 2.69E-13 | 1.10E-13  |
| <i>N</i> -nervonoyl valine           | BDL      |          |           | BDL         |          |           |
| <i>N</i> -linoleoyl valine           | BDL      |          |           | BDL         |          |           |
| <i>N</i> -docosahexaenoyl valine     | BDL      |          |           | BDL         |          |           |
| <b>Free Fatty Acids</b>              |          |          |           |             |          |           |
| Linoleic acid                        | 2.37E-09 | 7.16E-10 | 2.92E-10  | 2.17E-09    | 4.77E-10 | 1.95E-10  |
| Arachidonic acid                     | 1.25E-07 | 1.46E-08 | 5.97E-09  | 1.32E-07    | 1.17E-08 | 4.77E-09  |
| <b>2-acyl-<i>sn</i>-glycerol</b>     |          |          |           |             |          |           |
| 2-arachidonoyl- <i>sn</i> -glycerol  | 1.06E-09 | 2.83E-10 | 1.15E-10  | 1.12E-09    | 3.15E-10 | 1.29E-10  |
| 2-linoleoyl- <i>sn</i> -glycerol     | 2.08E-10 | 4.53E-11 | 1.85E-11  | 2.10E-10    | 2.77E-11 | 1.13E-11  |
| 2-oleoyl- <i>sn</i> -glycerol        | 1.99E-08 | 2.65E-09 | 1.08E-09  | 2.33E-08    | 3.13E-09 | 1.28E-09  |
| <b>Prostaglandins</b>                |          |          |           |             |          |           |
| PGE <sub>2</sub>                     | 4.47E-10 | 4.55E-11 | 1.86E-11  | 6.55E-10    | 9.72E-11 | 3.97E-11  |
| PGF <sub>2α</sub>                    | 2.39E-10 | 2.11E-11 | 8.60E-12  | 2.82E-10    | 2.76E-11 | 1.12E-11  |

**Supplemental Table 10: List of lipids in the cortex significantly affected by NAPE-PLD deletion**

| Cortex Significant Differences in One-Way ANOVA |         |       |                            |                        |
|-------------------------------------------------|---------|-------|----------------------------|------------------------|
| Lipid                                           | F       | p     | Direction (relative to WT) | Magnitude (x WT level) |
| <i>N</i> -palmitoyl ethanolamine                | 16.407  | 0.002 | ↓                          | 0.8                    |
| <i>N</i> -stearoyl ethanolamine                 | 91.684  | 0     | ↓                          | 0.52                   |
| <i>N</i> -oleoyl ethanolamine                   | 14.185  | 0.004 | ↓                          | 0.79                   |
| <i>N</i> -linoleoyl ethanolamine                | 221.023 | 0     | ↓                          | 0.23                   |
| <i>N</i> -arachidonoyl ethanolamine             | 73.166  | 0     | ↓                          | 0.47                   |
| <i>N</i> -docosahexaenoyl ethanolamine          | 132.305 | 0     | ↓                          | 0.39                   |
| <i>N</i> -palmitoyl glycine                     | 9.814   | 0.011 | ↑                          | 1.15                   |
| <i>N</i> -stearoyl glycine                      | 5.161   | 0.046 | ↑                          | 1.17                   |
| <i>N</i> -oleoyl glycine                        | 18.732  | 0.001 | ↑                          | 1.13                   |
| <i>N</i> -arachidonoyl glycine                  | 10.007  | 0.01  | ↑                          | 1.27                   |
| <i>N</i> -docosahexaenoyl glycine               | 6.172   | 0.032 | ↑                          | 1.31                   |
| <i>N</i> -oleoyl phenylalanine                  | 7.077   | 0.024 | ↑                          | 1.3                    |
| <i>N</i> -oleoyl serine                         | 4.264   | 0.066 | ↑                          | 1.17                   |
| <i>N</i> -stearoyl tyrosine                     | 4.012   | 0.073 | ↓                          | 0.83                   |
| <i>N</i> -arachidonoyl tyrosine                 | 4.162   | 0.069 | ↑                          | 1.38                   |
| <i>N</i> -docosahexaenoyl tyrosine              | 3.996   | 0.074 | ↑                          | 1.35                   |
| 2-oleoyl- <i>sn</i> -glycerol                   | 4.065   | 0.071 | ↑                          | 1.17                   |
| PGE <sub>2</sub>                                | 22.63   | 0.001 | ↑                          | 1.47                   |
| PGF <sub>2α</sub>                               | 9.098   | 0.013 | ↑                          | 1.18                   |



**Supplemental Table 11: Lipid levels in the hypothalamus (moles per gram) of WT and NAPE-PLD KO mice**

|                                 | Hypothalamus |          |           |             |          |           |
|---------------------------------|--------------|----------|-----------|-------------|----------|-----------|
|                                 | WT           |          |           | NAPE-PLD KO |          |           |
|                                 | Mean         | Std Dev  | Std Error | Mean        | Std Dev  | Std Error |
| <b>N-acyl alanine</b>           |              |          |           |             |          |           |
| N-palmitoyl alanine             | 3.38E-12     | 7.77E-13 | 3.17E-13  | 3.94E-12    | 6.67E-13 | 2.72E-13  |
| N-stearoyl alanine              | 5.86E-12     | 1.84E-12 | 7.52E-13  | 5.69E-12    | 2.26E-12 | 9.21E-13  |
| N-oleoyl alanine                | BDL          |          |           | BDL         |          |           |
| N-linoleoyl alanine             | BDL          |          |           | BDL         |          |           |
| N-arachidonoyl alanine          | BDL          |          |           | BDL         |          |           |
| N-docosahexaenoyl alanine       | BDL          |          |           | BDL         |          |           |
| <b>N-acyl dopamine</b>          |              |          |           |             |          |           |
| N-oleoyl dopamine               | BDL          |          |           | BDL         |          |           |
| N-arachidonoyl dopamine         | BDL          |          |           | BDL         |          |           |
| <b>N-acyl ethanolamine</b>      |              |          |           |             |          |           |
| N-palmitoyl ethanolamine        | 1.05E-10     | 1.50E-11 | 6.12E-12  | 7.56E-11    | 2.01E-11 | 8.20E-12  |
| N-stearoyl ethanolamine         | 9.49E-11     | 1.26E-11 | 5.13E-12  | 6.35E-11    | 3.24E-11 | 1.32E-11  |
| N-oleoyl ethanolamine           | 2.10E-10     | 2.32E-11 | 9.47E-12  | 1.35E-10    | 3.66E-11 | 1.49E-11  |
| N-linoleoyl ethanolamine        | 4.51E-11     | 1.11E-11 | 4.51E-12  | 2.90E-11    | 6.41E-12 | 2.62E-12  |
| N-arachidonoyl ethanolamine     | 1.44E-11     | 2.93E-12 | 1.19E-12  | 5.25E-12    | 1.06E-12 | 4.34E-13  |
| N-docosahexaenoyl ethanolamine  | 4.72E-11     | 1.11E-11 | 4.52E-12  | 1.57E-11    | 2.31E-12 | 9.42E-13  |
| <b>N-acyl GABA</b>              |              |          |           |             |          |           |
| N-palmitoyl GABA                | 6.58E-12     | 7.66E-13 | 3.13E-13  | 6.71E-12    | 1.87E-12 | 7.65E-13  |
| N-stearoyl GABA                 | 7.89E-12     | 1.57E-12 | 6.42E-13  | 8.67E-12    | 2.71E-12 | 1.11E-12  |
| N-oleoyl GABA                   | 1.54E-12     | 4.29E-13 | 1.75E-13  | 1.22E-12    | 5.56E-13 | 2.27E-13  |
| N-linoleoyl GABA                | BDL          |          |           | BDL         |          |           |
| N-arachidonoyl GABA             | 1.26E-11     | 4.41E-12 | 1.80E-12  | 1.28E-11    | 3.54E-12 | 1.44E-12  |
| N-docosahexaenoyl GABA          | BDL          |          |           | BDL         |          |           |
| <b>N-acyl glycine</b>           |              |          |           |             |          |           |
| N-palmitoyl glycine             | 3.77E-11     | 4.89E-12 | 2.00E-12  | 4.12E-11    | 5.06E-12 | 2.06E-12  |
| N-stearoyl glycine              | 1.09E-11     | 3.87E-12 | 1.58E-12  | 1.05E-11    | 2.85E-12 | 1.16E-12  |
| N-oleoyl glycine                | 9.20E-12     | 3.07E-12 | 1.26E-12  | 1.20E-11    | 4.03E-12 | 1.64E-12  |
| N-linoleoyl glycine             | BDL          |          |           | BDL         |          |           |
| N-arachidonoyl glycine          | 6.59E-12     | 2.94E-12 | 1.20E-12  | 5.49E-12    | 2.96E-12 | 1.21E-12  |
| N-docosahexaenoyl glycine       | BDL          |          |           | BDL         |          |           |
| <b>N-acyl leucine</b>           |              |          |           |             |          |           |
| N-palmitoyl leucine             | 2.02E-12     | 6.00E-13 | 2.45E-13  | 1.99E-12    | 6.13E-13 | 2.50E-13  |
| N-stearoyl leucine              | 3.07E-12     | 1.04E-12 | 4.26E-13  | 2.89E-12    | 8.40E-13 | 3.43E-13  |
| N-oleoyl leucine                | 1.09E-12     | 3.80E-13 | 1.55E-13  | 9.63E-13    | 4.35E-13 | 1.77E-13  |
| N-linoleoyl leucine             | BDL          |          |           | BDL         |          |           |
| N-docosahexaenoyl leucine       | BDL          |          |           | BDL         |          |           |
| <b>N-acyl methionine</b>        |              |          |           |             |          |           |
| N-palmitoyl methionine          | BDL          |          |           | BDL         |          |           |
| N-stearoyl methionine           | BDL          |          |           | BDL         |          |           |
| N-oleoyl methionine             | BDL          |          |           | BDL         |          |           |
| N-linoleoyl methionine          | BDL          |          |           | BDL         |          |           |
| N-arachidonoyl methionine       | BDL          |          |           | BDL         |          |           |
| N-docosahexaenoyl methionine    | BDL          |          |           | BDL         |          |           |
| <b>N-acyl phenylalanine</b>     |              |          |           |             |          |           |
| N-palmitoyl phenylalanine       | 2.45E-12     | 7.26E-13 | 2.96E-13  | 2.09E-12    | 6.78E-13 | 2.77E-13  |
| N-stearoyl phenylalanine        | 1.77E-12     | 5.14E-13 | 2.10E-13  | 1.84E-12    | 3.02E-13 | 1.23E-13  |
| N-oleoyl phenylalanine          | 6.29E-13     | 2.73E-13 | 1.12E-13  | 3.95E-13    | 2.22E-13 | 9.06E-14  |
| N-linoleoyl phenylalanine       | BDL          |          |           | BDL         |          |           |
| N-arachidonoyl phenylalanine    | BDL          |          |           | BDL         |          |           |
| N-docosahexaenoyl phenylalanine | BDL          |          |           | BDL         |          |           |

**Supplemental Table 11: Continued**

|                                      | Hypothalamus |          |           |             |          |           |
|--------------------------------------|--------------|----------|-----------|-------------|----------|-----------|
|                                      | WT           |          |           | NAPE-PLD KO |          |           |
|                                      | Mean         | Std Dev  | Std Error | Mean        | Std Dev  | Std Error |
| <b>N-acyl proline</b>                |              |          |           |             |          |           |
| <i>N</i> -palmitoyl proline          | BDL          |          |           | BDL         |          |           |
| <i>N</i> -stearoyl proline           | BDL          |          |           | BDL         |          |           |
| <i>N</i> -oleoyl proline             | 2.24E-12     | 6.20E-13 | 2.53E-13  | 2.53E-12    | 8.93E-13 | 3.64E-13  |
| <i>N</i> -linoleoyl proline          | BDL          |          |           | BDL         |          |           |
| <i>N</i> -arachidonoyl proline       | BDL          |          |           | BDL         |          |           |
| <i>N</i> -docosahexaenoyl proline    | BDL          |          |           | BDL         |          |           |
| <b>N-acyl serine</b>                 |              |          |           |             |          |           |
| <i>N</i> -palmitoyl serine           | 1.78E-11     | 2.41E-12 | 9.85E-13  | 1.27E-11    | 3.30E-12 | 1.35E-12  |
| <i>N</i> -stearoyl serine            | 1.90E-11     | 4.36E-12 | 1.78E-12  | 1.77E-11    | 2.96E-12 | 1.21E-12  |
| <i>N</i> -oleoyl serine              | 6.47E-10     | 1.41E-10 | 5.75E-11  | 7.00E-10    | 1.08E-10 | 4.42E-11  |
| <i>N</i> -linoleoyl serine           | 4.67E-11     | 1.43E-11 | 5.85E-12  | 4.76E-11    | 5.41E-12 | 2.21E-12  |
| <i>N</i> -arachidonoyl serine        | BDL          |          |           | BDL         |          |           |
| <i>N</i> -docosahexaenoyl serine     | BDL          |          |           | BDL         |          |           |
| <b>N-acyl taurine</b>                |              |          |           |             |          |           |
| <i>N</i> -arachidonoyl taurine       | 3.75E-11     | 8.59E-12 | 3.51E-12  | 4.73E-11    | 1.98E-11 | 8.10E-12  |
| <b>N-acyl tryptophan</b>             |              |          |           |             |          |           |
| <i>N</i> -palmitoyl tryptophan       | BDL          |          |           | BDL         |          |           |
| <i>N</i> -stearoyl tryptophan        | BDL          |          |           | BDL         |          |           |
| <i>N</i> -oleoyl tryptophan          | BDL          |          |           | BDL         |          |           |
| <i>N</i> -linoleoyl tryptophan       | BDL          |          |           | BDL         |          |           |
| <i>N</i> -arachidonoyl tryptophan    | BDL          |          |           | BDL         |          |           |
| <i>N</i> -docosahexaenoyl tryptophan | BDL          |          |           | BDL         |          |           |
| <b>N-acyl tyrosine</b>               |              |          |           |             |          |           |
| <i>N</i> -palmitoyl tyrosine         | 1.15E-12     | 5.05E-13 | 2.06E-13  | 8.68E-13    | 4.70E-13 | 1.92E-13  |
| <i>N</i> -stearoyl tyrosine          | BDL          |          |           | BDL         |          |           |
| <i>N</i> -oleoyl tyrosine            | BDL          |          |           | BDL         |          |           |
| <i>N</i> -linoleoyl tyrosine         | BDL          |          |           | BDL         |          |           |
| <i>N</i> -arachidonoyl tyrosine      | BDL          |          |           | BDL         |          |           |
| <i>N</i> -docosahexaenoyl tyrosine   | BDL          |          |           | BDL         |          |           |
| <b>N-acyl valine</b>                 |              |          |           |             |          |           |
| <i>N</i> -palmitoyl valine           | 1.83E-12     | 1.15E-12 | 4.71E-13  | 1.70E-12    | 4.67E-13 | 1.91E-13  |
| <i>N</i> -stearoyl valine            | 1.59E-12     | 7.20E-13 | 2.94E-13  | 1.53E-12    | 4.34E-13 | 1.77E-13  |
| <i>N</i> -oleoyl valine              | BDL          |          |           | BDL         |          |           |
| <i>N</i> -nervonoyl valine           | BDL          |          |           | BDL         |          |           |
| <i>N</i> -linoleoyl valine           | BDL          |          |           | BDL         |          |           |
| <i>N</i> -docosahexaenoyl valine     | BDL          |          |           | BDL         |          |           |
| <b>Free Fatty Acids</b>              |              |          |           |             |          |           |
| Linoleic acid                        | 3.75E-10     | 1.20E-10 | 4.90E-11  | 3.96E-10    | 1.30E-10 | 5.30E-11  |
| Arachidonic acid                     | 9.92E-09     | 1.06E-09 | 4.34E-10  | 1.00E-08    | 3.30E-09 | 1.35E-09  |
| <b>2-acyl-<i>sn</i>-glycerol</b>     |              |          |           |             |          |           |
| 2-arachidonoyl- <i>sn</i> -glycerol  | 2.76E-09     | 8.09E-10 | 3.30E-10  | 2.59E-09    | 7.22E-10 | 2.95E-10  |
| 2-linoleoyl- <i>sn</i> -glycerol     | 2.86E-10     | 5.55E-11 | 2.26E-11  | 2.62E-10    | 5.61E-11 | 2.29E-11  |
| 2-oleoyl- <i>sn</i> -glycerol        | 5.33E-08     | 2.91E-08 | 1.19E-08  | 4.97E-08    | 3.39E-08 | 1.38E-08  |
| <b>Prostaglandins</b>                |              |          |           |             |          |           |
| PGE <sub>2</sub>                     | 9.54E-11     | 4.67E-11 | 1.91E-11  | 1.46E-10    | 7.44E-11 | 3.04E-11  |
| PGF <sub>2α</sub>                    | 2.20E-10     | 4.54E-11 | 1.85E-11  | 2.49E-10    | 8.37E-11 | 3.42E-11  |

**Supplemental Table 12: List of lipids in the hypothalamus significantly affected by NAPE-PLD deletion**

| Hypothalamus Significant Differences in One-Way ANOVA |        |       |                            |                        |
|-------------------------------------------------------|--------|-------|----------------------------|------------------------|
| Lipid                                                 | F      | p     | Direction (relative to WT) | Magnitude (x WT level) |
| <i>N</i> -palmitoyl ethanolamine                      | 8.217  | 0.017 | ↓                          | 0.72                   |
| <i>N</i> -stearoyl ethanolamine                       | 4.908  | 0.051 | ↓                          | 0.67                   |
| <i>N</i> -oleoyl ethanolamine                         | 17.694 | 0.002 | ↓                          | 0.65                   |
| <i>N</i> -linoleoyl ethanolamine                      | 9.54   | 0.011 | ↓                          | 0.64                   |
| <i>N</i> -arachidonoyl ethanolamine                   | 52.147 | 0     | ↓                          | 0.37                   |
| <i>N</i> -docosahexaenoyl ethanolamine                | 46.277 | 0     | ↓                          | 0.33                   |
| <i>N</i> -palmitoyl serine                            | 9.422  | 0.012 | ↓                          | 0.71                   |

**Supplemental Table 13: Lipid levels in the midbrain (moles per gram)  
of WT and NAPE-PLD KO mice**

|                                         | Midbrain |          |           |             |          |           |
|-----------------------------------------|----------|----------|-----------|-------------|----------|-----------|
|                                         | WT       |          |           | NAPE-PLD KO |          |           |
|                                         | Mean     | Std Dev  | Std Error | Mean        | Std Dev  | Std Error |
| <b><i>N</i>-acyl alanine</b>            |          |          |           |             |          |           |
| <i>N</i> -palmitoyl alanine             | 3.37E-12 | 8.87E-13 | 3.62E-13  | 2.78E-12    | 5.15E-13 | 2.10E-13  |
| <i>N</i> -stearoyl alanine              | 2.19E-12 | 6.90E-13 | 2.82E-13  | 1.66E-12    | 4.00E-13 | 1.63E-13  |
| <i>N</i> -oleoyl alanine                | 1.19E-12 | 2.54E-13 | 1.04E-13  | 8.85E-13    | 3.17E-13 | 1.29E-13  |
| <i>N</i> -linoleoyl alanine             | BDL      |          |           | BDL         |          |           |
| <i>N</i> -arachidonoyl alanine          | BDL      |          |           | BDL         |          |           |
| <i>N</i> -docosahexaenoyl alanine       | BDL      |          |           | BDL         |          |           |
| <b><i>N</i>-acyl dopamine</b>           |          |          |           |             |          |           |
| <i>N</i> -oleoyl dopamine               | BDL      |          |           | BDL         |          |           |
| <i>N</i> -arachidonoyl dopamine         | BDL      |          |           | BDL         |          |           |
| <b><i>N</i>-acyl ethanolamine</b>       |          |          |           |             |          |           |
| <i>N</i> -palmitoyl ethanolamine        | 1.73E-10 | 2.18E-11 | 8.88E-12  | 1.15E-10    | 1.10E-11 | 4.49E-12  |
| <i>N</i> -stearoyl ethanolamine         | 9.88E-11 | 2.07E-11 | 8.46E-12  | 4.34E-11    | 6.84E-12 | 2.79E-12  |
| <i>N</i> -oleoyl ethanolamine           | 2.42E-10 | 3.77E-11 | 1.54E-11  | 1.85E-10    | 1.22E-11 | 4.99E-12  |
| <i>N</i> -linoleoyl ethanolamine        | 4.48E-11 | 5.69E-12 | 2.32E-12  | 1.66E-11    | 1.71E-12 | 7.00E-13  |
| <i>N</i> -arachidonoyl ethanolamine     | 2.14E-11 | 3.47E-12 | 1.42E-12  | 1.05E-11    | 1.13E-12 | 4.61E-13  |
| <i>N</i> -docosahexaenoyl ethanolamine  | 9.35E-11 | 1.54E-11 | 6.27E-12  | 2.82E-11    | 3.39E-12 | 1.38E-12  |
| <b><i>N</i>-acyl GABA</b>               |          |          |           |             |          |           |
| <i>N</i> -palmitoyl GABA                | 5.98E-12 | 4.59E-13 | 1.88E-13  | 5.89E-12    | 4.26E-13 | 1.74E-13  |
| <i>N</i> -stearoyl GABA                 | 6.68E-12 | 1.41E-12 | 5.76E-13  | 6.07E-12    | 1.15E-12 | 4.70E-13  |
| <i>N</i> -oleoyl GABA                   | 1.75E-12 | 3.47E-13 | 1.42E-13  | 1.72E-12    | 3.44E-13 | 1.40E-13  |
| <i>N</i> -linoleoyl GABA                | BDL      |          |           | BDL         |          |           |
| <i>N</i> -arachidonoyl GABA             | 1.55E-11 | 2.31E-12 | 9.43E-13  | 1.61E-11    | 2.06E-12 | 8.42E-13  |
| <i>N</i> -docosahexaenoyl GABA          | 1.26E-11 | 2.80E-12 | 1.14E-12  | 1.42E-11    | 1.44E-12 | 5.90E-13  |
| <b><i>N</i>-acyl glycine</b>            |          |          |           |             |          |           |
| <i>N</i> -palmitoyl glycine             | 3.06E-11 | 4.95E-12 | 2.02E-12  | 3.19E-11    | 3.50E-12 | 1.43E-12  |
| <i>N</i> -stearoyl glycine              | 1.04E-11 | 1.83E-12 | 7.46E-13  | 7.09E-12    | 1.25E-12 | 5.12E-13  |
| <i>N</i> -oleoyl glycine                | 1.14E-11 | 1.43E-12 | 5.83E-13  | 1.09E-11    | 2.27E-12 | 9.25E-13  |
| <i>N</i> -linoleoyl glycine             | BDL      |          |           | BDL         |          |           |
| <i>N</i> -arachidonoyl glycine          | 1.86E-11 | 4.19E-12 | 1.71E-12  | 1.93E-11    | 4.07E-12 | 1.66E-12  |
| <i>N</i> -docosahexaenoyl glycine       | 2.34E-12 | 6.46E-13 | 2.64E-13  | 2.81E-12    | 1.09E-12 | 4.43E-13  |
| <b><i>N</i>-acyl leucine</b>            |          |          |           |             |          |           |
| <i>N</i> -palmitoyl leucine             | 1.86E-12 | 3.72E-13 | 1.52E-13  | 1.64E-12    | 2.81E-13 | 1.15E-13  |
| <i>N</i> -stearoyl leucine              | 2.14E-12 | 4.12E-13 | 1.68E-13  | 2.08E-12    | 4.87E-13 | 1.99E-13  |
| <i>N</i> -oleoyl leucine                | 1.23E-12 | 2.37E-13 | 9.66E-14  | 1.42E-12    | 4.66E-13 | 1.90E-13  |
| <i>N</i> -linoleoyl leucine             | BDL      |          |           | BDL         |          |           |
| <i>N</i> -docosahexaenoyl leucine       | 8.87E-13 | 2.65E-13 | 1.08E-13  | 1.10E-12    | 3.92E-13 | 1.60E-13  |
| <b><i>N</i>-acyl methionine</b>         |          |          |           |             |          |           |
| <i>N</i> -palmitoyl methionine          | BDL      |          |           | BDL         |          |           |
| <i>N</i> -stearoyl methionine           | 9.45E-13 | 5.62E-13 | 2.30E-13  | 6.94E-13    | 4.54E-13 | 1.85E-13  |
| <i>N</i> -oleoyl methionine             | BDL      |          |           | BDL         |          |           |
| <i>N</i> -linoleoyl methionine          | BDL      |          |           | BDL         |          |           |
| <i>N</i> -arachidonoyl methionine       | BDL      |          |           | BDL         |          |           |
| <i>N</i> -docosahexaenoyl methionine    | BDL      |          |           | BDL         |          |           |
| <b><i>N</i>-acyl phenylalanine</b>      |          |          |           |             |          |           |
| <i>N</i> -palmitoyl phenylalanine       | 2.36E-12 | 3.36E-13 | 1.37E-13  | 2.51E-12    | 5.77E-13 | 2.36E-13  |
| <i>N</i> -stearoyl phenylalanine        | 1.59E-12 | 2.90E-13 | 1.18E-13  | 1.25E-12    | 5.57E-13 | 2.27E-13  |
| <i>N</i> -oleoyl phenylalanine          | 6.57E-13 | 5.05E-14 | 2.06E-14  | 6.75E-13    | 1.41E-13 | 5.77E-14  |
| <i>N</i> -linoleoyl phenylalanine       | BDL      |          |           | BDL         |          |           |
| <i>N</i> -arachidonoyl phenylalanine    | 9.48E-13 | 5.82E-13 | 2.38E-13  | 6.86E-13    | 2.73E-13 | 1.12E-13  |
| <i>N</i> -docosahexaenoyl phenylalanine | 5.66E-13 | 2.07E-13 | 8.46E-14  | 1.15E-12    | 2.99E-13 | 1.22E-13  |

**Supplemental Table 13: Continued**

|                                      | Midbrain |          |           |             |          |           |
|--------------------------------------|----------|----------|-----------|-------------|----------|-----------|
|                                      | WT       |          |           | NAPE-PLD KO |          |           |
|                                      | Mean     | Std Dev  | Std Error | Mean        | Std Dev  | Std Error |
| <b>N-acyl proline</b>                |          |          |           |             |          |           |
| <i>N</i> -palmitoyl proline          | 1.23E-12 | 3.96E-13 | 1.61E-13  | 1.04E-12    | 4.03E-13 | 1.65E-13  |
| <i>N</i> -stearoyl proline           | BDL      |          |           | BDL         |          |           |
| <i>N</i> -oleoyl proline             | BDL      |          |           | BDL         |          |           |
| <i>N</i> -linoleoyl proline          | BDL      |          |           | BDL         |          |           |
| <i>N</i> -arachidonoyl proline       | BDL      |          |           | BDL         |          |           |
| <i>N</i> -docosahexaenoyl proline    | BDL      |          |           | BDL         |          |           |
| <b>N-acyl serine</b>                 |          |          |           |             |          |           |
| <i>N</i> -palmitoyl serine           | 4.04E-11 | 5.57E-12 | 2.27E-12  | 3.98E-11    | 4.89E-12 | 2.00E-12  |
| <i>N</i> -stearoyl serine            | 2.81E-11 | 8.57E-12 | 3.50E-12  | 2.45E-11    | 3.76E-12 | 1.54E-12  |
| <i>N</i> -oleoyl serine              | 2.72E-10 | 2.51E-11 | 1.02E-11  | 3.06E-10    | 3.94E-11 | 1.61E-11  |
| <i>N</i> -linoleoyl serine           | 2.27E-11 | 4.42E-12 | 1.80E-12  | 3.28E-11    | 6.36E-12 | 2.60E-12  |
| <i>N</i> -arachidonoyl serine        | 4.24E-13 | 3.54E-13 | 1.45E-13  | 7.38E-13    | 1.88E-13 | 7.67E-14  |
| <i>N</i> -docosahexaenoyl serine     | 3.35E-12 | 1.18E-12 | 4.82E-13  | 4.81E-12    | 3.05E-12 | 1.24E-12  |
| <b>N-acyl taurine</b>                |          |          |           |             |          |           |
| <i>N</i> -arachidonoyl taurine       | 1.01E-10 | 1.44E-11 | 5.88E-12  | 1.12E-10    | 1.71E-11 | 6.97E-12  |
| <b>N-acyl tryptophan</b>             |          |          |           |             |          |           |
| <i>N</i> -palmitoyl tryptophan       | 1.68E-12 | 2.78E-13 | 1.14E-13  | 1.30E-12    | 5.61E-13 | 2.29E-13  |
| <i>N</i> -stearoyl tryptophan        | 1.49E-12 | 5.18E-13 | 2.11E-13  | 1.54E-12    | 4.60E-13 | 1.88E-13  |
| <i>N</i> -oleoyl tryptophan          | BDL      |          |           | BDL         |          |           |
| <i>N</i> -linoleoyl tryptophan       | BDL      |          |           | BDL         |          |           |
| <i>N</i> -arachidonoyl tryptophan    | BDL      |          |           | BDL         |          |           |
| <i>N</i> -docosahexaenoyl tryptophan | BDL      |          |           | BDL         |          |           |
| <b>N-acyl tyrosine</b>               |          |          |           |             |          |           |
| <i>N</i> -palmitoyl tyrosine         | 1.28E-12 | 2.63E-13 | 1.07E-13  | 1.22E-12    | 1.16E-13 | 4.73E-14  |
| <i>N</i> -stearoyl tyrosine          | BDL      |          |           | BDL         |          |           |
| <i>N</i> -oleoyl tyrosine            | 5.14E-13 | 2.10E-13 | 8.58E-14  | 6.22E-13    | 4.89E-13 | 2.00E-13  |
| <i>N</i> -linoleoyl tyrosine         | BDL      |          |           | BDL         |          |           |
| <i>N</i> -arachidonoyl tyrosine      | 1.91E-12 | 3.59E-13 | 1.47E-13  | 1.45E-12    | 7.66E-13 | 3.13E-13  |
| <i>N</i> -docosahexaenoyl tyrosine   | BDL      |          |           | BDL         |          |           |
| <b>N-acyl valine</b>                 |          |          |           |             |          |           |
| <i>N</i> -palmitoyl valine           | 2.02E-12 | 5.26E-13 | 2.15E-13  | 1.67E-12    | 6.97E-13 | 2.84E-13  |
| <i>N</i> -stearoyl valine            | 1.09E-12 | 1.64E-13 | 6.71E-14  | 9.77E-13    | 2.71E-13 | 1.11E-13  |
| <i>N</i> -oleoyl valine              | 1.40E-12 | 4.67E-13 | 1.91E-13  | 2.27E-12    | 6.87E-13 | 2.80E-13  |
| <i>N</i> -nervonoyl valine           | BDL      |          |           | BDL         |          |           |
| <i>N</i> -linoleoyl valine           | BDL      |          |           | BDL         |          |           |
| <i>N</i> -docosahexaenoyl valine     | BDL      |          |           | BDL         |          |           |
| <b>Free Fatty Acids</b>              |          |          |           |             |          |           |
| Linoleic acid                        | 1.57E-09 | 3.45E-10 | 1.41E-10  | 1.37E-09    | 2.58E-10 | 1.06E-10  |
| Arachidonic acid                     | 1.01E-07 | 1.38E-08 | 5.65E-09  | 1.08E-07    | 1.18E-08 | 4.83E-09  |
| <b>2-acyl-<i>sn</i>-glycerol</b>     |          |          |           |             |          |           |
| 2-arachidonoyl- <i>sn</i> -glycerol  | 3.04E-09 | 4.28E-10 | 1.75E-10  | 3.47E-09    | 5.41E-10 | 2.21E-10  |
| 2-linoleoyl- <i>sn</i> -glycerol     | 6.42E-10 | 1.02E-10 | 4.15E-11  | 5.26E-10    | 5.12E-11 | 2.09E-11  |
| 2-oleoyl- <i>sn</i> -glycerol        | 7.99E-08 | 1.91E-08 | 7.78E-09  | 8.26E-08    | 1.29E-08 | 5.28E-09  |
| <b>Prostaglandins</b>                |          |          |           |             |          |           |
| PGE <sub>2</sub>                     | 2.75E-10 | 6.80E-11 | 2.77E-11  | 3.49E-10    | 5.93E-11 | 2.42E-11  |
| PGF <sub>2α</sub>                    | 1.81E-10 | 4.06E-11 | 1.66E-11  | 2.01E-10    | 3.08E-11 | 1.26E-11  |

**Supplemental Table 14: List of lipids in the midbrain significantly affected by NAPE-PLD deletion**

| Midbrain Significant Differences in One-Way ANOVA |         |       |                            |                        |
|---------------------------------------------------|---------|-------|----------------------------|------------------------|
| Lipid                                             | F       | p     | Direction (relative to WT) | Magnitude (x WT level) |
| <i>N</i> -oleoyl alanine                          | 3.42    | 0.094 | ↓                          | 0.76                   |
| <i>N</i> -palmitoyl ethanolamine                  | 33.455  | 0     | ↓                          | 0.67                   |
| <i>N</i> -stearoyl ethanolamine                   | 38.682  | 0     | ↓                          | 0.44                   |
| <i>N</i> -oleoyl ethanolamine                     | 12.745  | 0.005 | ↓                          | 0.76                   |
| <i>N</i> -linoleoyl ethanolamine                  | 135.356 | 0     | ↓                          | 0.37                   |
| <i>N</i> -arachidonoyl ethanolamine               | 53.58   | 0     | ↓                          | 0.49                   |
| <i>N</i> -docosahexaenoyl ethanolamine            | 103.4   | 0     | ↓                          | 0.3                    |
| <i>N</i> -stearoyl glycine                        | 13.46   | 0.004 | ↓                          | 0.68                   |
| <i>N</i> -docosahexaenoyl phenylalanine           | 15.305  | 0.003 | ↑                          | 1.87                   |
| <i>N</i> -linoleoyl serine                        | 10.15   | 0.01  | ↑                          | 1.44                   |
| <i>N</i> -arachidonoyl serine                     | 3.678   | 0.084 | ↑                          | 1.6                    |
| <i>N</i> -oleoyl valine                           | 6.636   | 0.028 | ↑                          | 1.58                   |
| 2-linoleoyl- <i>sn</i> -glycerol                  | 6.244   | 0.032 | ↓                          | 0.82                   |
| PGE <sub>2</sub>                                  | 4.019   | 0.073 | ↑                          | 1.27                   |

**Supplemental Table 15: Lipid levels in the brainstem (moles per gram tissue) of WT and NAPE-PLD KO mice**

|                                         | Brainstem |          |           |             |          |           |
|-----------------------------------------|-----------|----------|-----------|-------------|----------|-----------|
|                                         | WT        |          |           | NAPE-PLD KO |          |           |
|                                         | Mean      | Std Dev  | Std Error | Mean        | Std Dev  | Std Error |
| <b><i>N</i>-acyl alanine</b>            |           |          |           |             |          |           |
| <i>N</i> -palmitoyl alanine             | 1.21E-11  | 7.40E-12 | 3.02E-12  | 5.87E-12    | 2.33E-12 | 9.52E-13  |
| <i>N</i> -stearoyl alanine              | 1.36E-11  | 7.18E-12 | 2.93E-12  | 8.99E-12    | 2.90E-12 | 1.18E-12  |
| <i>N</i> -oleoyl alanine                | 5.06E-12  | 3.02E-12 | 1.23E-12  | 2.95E-12    | 1.11E-12 | 4.52E-13  |
| <i>N</i> -linoleoyl alanine             | BDL       |          |           | BDL         |          |           |
| <i>N</i> -arachidonoyl alanine          | 1.46E-12  | 1.20E-12 | 4.88E-13  | 4.98E-13    | 1.74E-13 | 7.09E-14  |
| <i>N</i> -docosahexaenoyl alanine       | BDL       |          |           | BDL         |          |           |
| <b><i>N</i>-acyl dopamine</b>           |           |          |           |             |          |           |
| <i>N</i> -oleoyl dopamine               | BDL       |          |           | BDL         |          |           |
| <i>N</i> -arachidonoyl dopamine         | BDL       |          |           | BDL         |          |           |
| <b><i>N</i>-acyl ethanolamine</b>       |           |          |           |             |          |           |
| <i>N</i> -palmitoyl ethanolamine        | 5.74E-10  | 7.61E-11 | 3.11E-11  | 3.32E-10    | 2.80E-11 | 1.14E-11  |
| <i>N</i> -stearoyl ethanolamine         | 4.11E-10  | 8.23E-11 | 3.36E-11  | 1.46E-10    | 2.07E-11 | 8.45E-12  |
| <i>N</i> -oleoyl ethanolamine           | 9.51E-10  | 1.28E-10 | 5.25E-11  | 7.03E-10    | 8.47E-11 | 3.46E-11  |
| <i>N</i> -linoleoyl ethanolamine        | 4.87E-11  | 9.73E-12 | 3.97E-12  | 1.42E-11    | 9.14E-13 | 3.73E-13  |
| <i>N</i> -arachidonoyl ethanolamine     | 2.23E-11  | 4.22E-12 | 1.72E-12  | 9.24E-12    | 8.66E-13 | 3.54E-13  |
| <i>N</i> -docosahexaenoyl ethanolamine  | 2.39E-10  | 4.43E-11 | 1.81E-11  | 4.14E-11    | 5.74E-12 | 2.34E-12  |
| <b><i>N</i>-acyl GABA</b>               |           |          |           |             |          |           |
| <i>N</i> -palmitoyl GABA                | 1.11E-11  | 4.68E-12 | 1.91E-12  | 8.56E-12    | 1.57E-12 | 6.42E-13  |
| <i>N</i> -stearoyl GABA                 | 1.42E-11  | 7.54E-12 | 3.08E-12  | 9.95E-12    | 2.18E-12 | 8.89E-13  |
| <i>N</i> -oleoyl GABA                   | 7.15E-12  | 3.92E-12 | 1.60E-12  | 5.11E-12    | 8.51E-13 | 3.48E-13  |
| <i>N</i> -linoleoyl GABA                | 1.18E-12  | 7.27E-13 | 2.97E-13  | 7.27E-13    | 2.47E-13 | 1.01E-13  |
| <i>N</i> -arachidonoyl GABA             | 7.02E-12  | 1.97E-12 | 8.06E-13  | 5.47E-12    | 7.36E-13 | 3.00E-13  |
| <i>N</i> -docosahexaenoyl GABA          | 7.40E-11  | 4.45E-11 | 1.82E-11  | 4.41E-11    | 1.03E-11 | 4.22E-12  |
| <b><i>N</i>-acyl glycine</b>            |           |          |           |             |          |           |
| <i>N</i> -palmitoyl glycine             | 3.55E-11  | 8.33E-12 | 3.40E-12  | 2.76E-11    | 4.68E-12 | 1.91E-12  |
| <i>N</i> -stearoyl glycine              | 3.52E-11  | 1.26E-11 | 5.16E-12  | 2.66E-11    | 6.89E-12 | 2.81E-12  |
| <i>N</i> -oleoyl glycine                | 3.26E-11  | 1.18E-11 | 4.82E-12  | 2.42E-11    | 5.61E-12 | 2.29E-12  |
| <i>N</i> -linoleoyl glycine             | 4.30E-12  | 1.69E-12 | 6.90E-13  | 3.00E-12    | 1.23E-12 | 5.03E-13  |
| <i>N</i> -arachidonoyl glycine          | 2.01E-11  | 3.35E-12 | 1.37E-12  | 2.34E-11    | 2.99E-12 | 1.22E-12  |
| <i>N</i> -docosahexaenoyl glycine       | 1.50E-11  | 5.67E-12 | 2.32E-12  | 1.42E-11    | 5.59E-12 | 2.28E-12  |
| <b><i>N</i>-acyl leucine</b>            |           |          |           |             |          |           |
| <i>N</i> -palmitoyl leucine             | 8.94E-13  | 2.99E-13 | 1.22E-13  | 7.28E-13    | 1.71E-13 | 6.99E-14  |
| <i>N</i> -stearoyl leucine              | 4.48E-13  | 1.43E-13 | 5.85E-14  | 3.18E-13    | 1.61E-13 | 6.56E-14  |
| <i>N</i> -oleoyl leucine                | 8.54E-13  | 5.61E-13 | 2.29E-13  | 4.46E-13    | 1.28E-13 | 5.24E-14  |
| <i>N</i> -linoleoyl leucine             | BDL       |          |           | BDL         |          |           |
| <i>N</i> -docosahexaenoyl leucine       | BDL       |          |           | BDL         |          |           |
| <b><i>N</i>-acyl methionine</b>         |           |          |           |             |          |           |
| <i>N</i> -palmitoyl methionine          | 3.00E-12  | 1.26E-12 | 5.15E-13  | 3.00E-12    | 8.96E-13 | 3.66E-13  |
| <i>N</i> -stearoyl methionine           | 2.51E-12  | 8.14E-13 | 3.32E-13  | 2.04E-12    | 5.26E-13 | 2.15E-13  |
| <i>N</i> -oleoyl methionine             | 1.17E-12  | 3.49E-13 | 1.42E-13  | 9.73E-13    | 4.54E-13 | 1.86E-13  |
| <i>N</i> -linoleoyl methionine          | BDL       |          |           | BDL         |          |           |
| <i>N</i> -arachidonoyl methionine       | BDL       |          |           | BDL         |          |           |
| <i>N</i> -docosahexaenoyl methionine    | BDL       |          |           | BDL         |          |           |
| <b><i>N</i>-acyl phenylalanine</b>      |           |          |           |             |          |           |
| <i>N</i> -palmitoyl phenylalanine       | 3.92E-12  | 5.48E-13 | 2.24E-13  | 3.71E-12    | 2.25E-13 | 9.20E-14  |
| <i>N</i> -stearoyl phenylalanine        | 2.15E-12  | 4.01E-13 | 1.64E-13  | 1.67E-12    | 4.64E-13 | 1.89E-13  |
| <i>N</i> -oleoyl phenylalanine          | 2.31E-12  | 6.05E-13 | 2.47E-13  | 2.20E-12    | 5.24E-13 | 2.14E-13  |
| <i>N</i> -linoleoyl phenylalanine       | BDL       |          |           | BDL         |          |           |
| <i>N</i> -arachidonoyl phenylalanine    | 1.08E-12  | 3.09E-13 | 1.26E-13  | 8.81E-13    | 1.98E-13 | 8.08E-14  |
| <i>N</i> -docosahexaenoyl phenylalanine | 1.07E-12  | 3.68E-13 | 1.50E-13  | 7.81E-13    | 1.61E-13 | 6.56E-14  |

**Supplemental Table 15: Continued**

|                                      | Brainstem |          |           |             |          |           |
|--------------------------------------|-----------|----------|-----------|-------------|----------|-----------|
|                                      | WT        |          |           | NAPE-PLD KO |          |           |
|                                      | Mean      | Std Dev  | Std Error | Mean        | Std Dev  | Std Error |
| <b>N-acyl proline</b>                |           |          |           |             |          |           |
| <i>N</i> -palmitoyl proline          | 3.24E-11  | 8.64E-12 | 3.53E-12  | 2.17E-11    | 3.54E-12 | 1.45E-12  |
| <i>N</i> -stearoyl proline           | 1.70E-11  | 5.53E-12 | 2.26E-12  | 1.33E-11    | 2.24E-12 | 9.15E-13  |
| <i>N</i> -oleoyl proline             | BDL       |          |           | BDL         |          |           |
| <i>N</i> -linoleoyl proline          | BDL       |          |           | BDL         |          |           |
| <i>N</i> -arachidonoyl proline       | BDL       |          |           | BDL         |          |           |
| <i>N</i> -docosahexaenoyl proline    | BDL       |          |           | BDL         |          |           |
| <b>N-acyl serine</b>                 |           |          |           |             |          |           |
| <i>N</i> -palmitoyl serine           | 9.33E-11  | 1.52E-11 | 6.20E-12  | 8.52E-11    | 7.15E-12 | 2.92E-12  |
| <i>N</i> -stearoyl serine            | 7.30E-11  | 2.75E-11 | 1.12E-11  | 4.74E-11    | 7.78E-12 | 3.18E-12  |
| <i>N</i> -oleoyl serine              | 4.65E-10  | 1.13E-10 | 4.59E-11  | 3.79E-10    | 3.85E-11 | 1.57E-11  |
| <i>N</i> -linoleoyl serine           | 4.63E-11  | 1.68E-11 | 6.84E-12  | 4.09E-11    | 2.86E-12 | 1.17E-12  |
| <i>N</i> -arachidonoyl serine        | 2.80E-12  | 1.80E-12 | 7.37E-13  | 2.04E-12    | 1.09E-12 | 4.47E-13  |
| <i>N</i> -docosahexaenoyl serine     | 2.21E-11  | 1.57E-11 | 6.39E-12  | 1.57E-11    | 7.22E-12 | 2.95E-12  |
| <b>N-acyl taurine</b>                |           |          |           |             |          |           |
| <i>N</i> -arachidonoyl taurine       | 6.55E-11  | 1.02E-11 | 4.16E-12  | 7.32E-11    | 8.68E-12 | 3.55E-12  |
| <b>N-acyl tryptophan</b>             |           |          |           |             |          |           |
| <i>N</i> -palmitoyl tryptophan       | 3.71E-12  | 1.07E-12 | 4.38E-13  | 2.38E-12    | 4.93E-13 | 2.01E-13  |
| <i>N</i> -stearoyl tryptophan        | 4.27E-12  | 9.65E-13 | 3.94E-13  | 3.60E-12    | 6.31E-13 | 2.57E-13  |
| <i>N</i> -oleoyl tryptophan          | BDL       |          |           | BDL         |          |           |
| <i>N</i> -linoleoyl tryptophan       | BDL       |          |           | BDL         |          |           |
| <i>N</i> -arachidonoyl tryptophan    | BDL       |          |           | BDL         |          |           |
| <i>N</i> -docosahexaenoyl tryptophan | BDL       |          |           | BDL         |          |           |
| <b>N-acyl tyrosine</b>               |           |          |           |             |          |           |
| <i>N</i> -palmitoyl tyrosine         | 1.69E-12  | 5.54E-13 | 2.26E-13  | 1.27E-12    | 2.63E-13 | 1.07E-13  |
| <i>N</i> -stearoyl tyrosine          | 6.27E-13  | 1.59E-13 | 6.47E-14  | 7.35E-13    | 2.45E-13 | 9.98E-14  |
| <i>N</i> -oleoyl tyrosine            | 9.86E-13  | 5.13E-13 | 2.09E-13  | 1.26E-12    | 3.23E-13 | 1.32E-13  |
| <i>N</i> -linoleoyl tyrosine         | BDL       |          |           | BDL         |          |           |
| <i>N</i> -arachidonoyl tyrosine      | BDL       |          |           | BDL         |          |           |
| <i>N</i> -docosahexaenoyl tyrosine   | 8.78E-13  | 2.88E-13 | 1.18E-13  | 7.31E-13    | 3.33E-13 | 1.36E-13  |
| <b>N-acyl valine</b>                 |           |          |           |             |          |           |
| <i>N</i> -palmitoyl valine           | 3.89E-12  | 1.50E-12 | 6.13E-13  | 2.50E-12    | 1.19E-12 | 4.86E-13  |
| <i>N</i> -stearoyl valine            | 1.31E-12  | 6.81E-13 | 2.78E-13  | 1.17E-12    | 6.15E-13 | 2.51E-13  |
| <i>N</i> -oleoyl valine              | 3.25E-12  | 1.13E-12 | 4.62E-13  | 2.78E-12    | 8.99E-13 | 3.67E-13  |
| <i>N</i> -nervonoyl valine           | BDL       |          |           | BDL         |          |           |
| <i>N</i> -linoleoyl valine           | BDL       |          |           | BDL         |          |           |
| <i>N</i> -docosahexaenoyl valine     | BDL       |          |           | BDL         |          |           |
| <b>Free Fatty Acids</b>              |           |          |           |             |          |           |
| Linoleic acid                        | 1.43E-08  | 1.52E-09 | 6.20E-10  | 1.09E-08    | 2.32E-09 | 9.45E-10  |
| Arachidonic acid                     | 2.30E-09  | 4.19E-10 | 1.71E-10  | 1.86E-09    | 7.87E-11 | 3.21E-11  |
| <b>2-acyl-<i>sn</i>-glycerol</b>     |           |          |           |             |          |           |
| 2-arachidonoyl- <i>sn</i> -glycerol  | 1.16E-08  | 3.44E-09 | 1.40E-09  | 1.58E-08    | 2.89E-09 | 1.18E-09  |
| 2-linoleoyl- <i>sn</i> -glycerol     | 1.49E-09  | 3.07E-10 | 1.26E-10  | 1.18E-09    | 2.32E-10 | 9.47E-11  |
| 2-oleoyl- <i>sn</i> -glycerol        | 1.89E-08  | 3.19E-09 | 1.30E-09  | 1.84E-08    | 2.69E-09 | 1.10E-09  |
| <b>Prostaglandins</b>                |           |          |           |             |          |           |
| PGE <sub>2</sub>                     | 4.09E-10  | 1.06E-10 | 4.33E-11  | 5.39E-10    | 8.10E-11 | 3.31E-11  |
| PGF <sub>2α</sub>                    | 1.70E-10  | 4.17E-11 | 1.70E-11  | 2.24E-10    | 2.83E-11 | 1.16E-11  |



**Supplemental Table 16: List of lipids in the brainstem significantly affected by NAPE-PLD deletion**

| Brainstem Significant Differences in One-Way ANOVA |         |       |                            |                        |
|----------------------------------------------------|---------|-------|----------------------------|------------------------|
| Lipid                                              | F       | p     | Direction (relative to WT) | Magnitude (x WT level) |
| <i>N</i> -palmitoyl alanine                        | 3.851   | 0.078 | ↓                          | 0.49                   |
| <i>N</i> -arachidonoyl alanine                     | 3.796   | 0.08  | ↓                          | 0.38                   |
| <i>N</i> -palmitoyl ethanolamine                   | 53.892  | 0     | ↓                          | 0.58                   |
| <i>N</i> -stearoyl ethanolamine                    | 58.7    | 0     | ↓                          | 0.35                   |
| <i>N</i> -oleoyl ethanolamine                      | 15.535  | 0.003 | ↓                          | 0.74                   |
| <i>N</i> -linoleoyl ethanolamine                   | 74.782  | 0     | ↓                          | 0.29                   |
| <i>N</i> -arachidonoyl ethanolamine                | 54.875  | 0     | ↓                          | 0.42                   |
| <i>N</i> -docosahexaenoyl ethanolamine             | 117.889 | 0     | ↓                          | 0.17                   |
| <i>N</i> -palmitoyl glycine                        | 4.103   | 0.07  | ↓                          | 0.78                   |
| <i>N</i> -stearoyl phenylalanine                   | 3.748   | 0.082 | ↓                          | 0.78                   |
| <i>N</i> -palmitoyl proline                        | 7.837   | 0.019 | ↓                          | 0.67                   |
| <i>N</i> -stearoyl serine                          | 4.797   | 0.053 | ↓                          | 0.65                   |
| <i>N</i> -palmitoyl tryptophan                     | 7.583   | 0.02  | ↓                          | 0.65                   |
| Linoleic acid                                      | 9.069   | 0.013 | ↓                          | 0.76                   |
| Arachidonic acid                                   | 6.453   | 0.029 | ↓                          | 0.81                   |
| 2-arachidonoyl- <i>sn</i> -glycerol                | 5.243   | 0.045 | ↑                          | 1.36                   |
| 2-linoleoyl- <i>sn</i> -glycerol                   | 3.79    | 0.08  | ↓                          | 0.79                   |
| PGE <sub>2</sub>                                   | 5.687   | 0.038 | ↑                          | 1.32                   |
| PGF <sub>2α</sub>                                  | 7.027   | 0.024 | ↑                          | 1.32                   |
